# Supplementary material for: Gastric cancer-derived exosomal miR-519a-3p promotes liver metastasis by inducing intrahepatic M2-like macrophage-mediated angiogenesis
Source: PubMed Central journal article supplement (PMC9549645; doi:10.1186/s13046-022-02499-8), 2022-10-10
Supplement: 13046_2022_2499_MOESM2_ESM.pdf [file 13046_2022_2499_MOESM2_ESM.pdf]

| <b>ID</b>         | <b>logFC</b> | <b>logCPM</b> | <b>PValue</b> | <b>FDR</b> |
|-------------------|--------------|---------------|---------------|------------|
| hsa-miR-516a-5p   | 8.97169363   | 6.95437622    | 3.21E-38      | 3.08E-37   |
| hsa-miR-522-3p    | 8.78928566   | 6.77240147    | 8.71E-34      | 7.46E-33   |
| hsa-miR-1283      | 7.85569      | 5.89758682    | 3.40E-19      | 1.71E-18   |
| hsa-miR-675-5p    | 7.12970647   | 5.29163616    | 5.79E-13      | 2.21E-12   |
| hsa-miR-338-3p    | 6.92564318   | 5.12816379    | 3.78E-11      | 1.35E-10   |
| hsa-miR-519a-3p   | 6.80385208   | 5.01705696    | 4.82E-10      | 1.59E-09   |
| hsa-miR-148a-5p   | 6.70946717   | 7.20218449    | 1.52E-46      | 2.09E-45   |
| hsa-miR-10a-3p    | 6.21084894   | 7.20641755    | 7.50E-47      | 1.08E-45   |
| hsa-miR-203a      | 6.16748887   | 8.45448104    | 2.34E-67      | 6.17E-66   |
| hsa-miR-519a-5p   | 6.04140726   | 4.48655578    | 5.71E-07      | 1.45E-06   |
| hsa-miR-196a-3p   | 6.03987887   | 4.48685987    | 7.80E-07      | 1.96E-06   |
| hsa-miR-148a-3p   | 5.96656369   | 15.5450524    | 9.90E-123     | 7.85E-121  |
| hsa-miR-139-5p    | 5.72933388   | 7.39289677    | 4.48E-51      | 7.47E-50   |
| hsa-miR-338-5p    | 5.41321145   | 8.03073935    | 1.11E-52      | 1.95E-51   |
| hsa-miR-27a-5p    | 5.36397297   | 6.4113825     | 9.20E-30      | 7.29E-29   |
| hsa-miR-10a-5p    | 5.24473417   | 12.4468775    | 1.75E-149     | 2.78E-147  |
| hsa-miR-105-5p    | 5.20769822   | 7.52007786    | 2.20E-48      | 3.32E-47   |
| hsa-miR-212-3p    | 5.10332164   | 5.07575309    | 2.05E-10      | 6.90E-10   |
| hsa-miR-675-3p    | 5.03023685   | 6.97394304    | 1.02E-30      | 8.52E-30   |
| hsa-miR-125b-2-3p | 4.75005348   | 4.83698736    | 2.17E-08      | 6.25E-08   |
| hsa-miR-296-3p    | 4.72207593   | 4.80835131    | 3.08E-09      | 9.69E-09   |
| hsa-miR-132-3p    | 4.54343821   | 9.07279725    | 3.70E-64      | 9.03E-63   |
| hsa-miR-767-5p    | 4.36519267   | 7.49346022    | 7.01E-42      | 8.54E-41   |
| hsa-miR-95-3p     | 4.30026438   | 9.60259247    | 6.87E-74      | 2.42E-72   |
| hsa-miR-193a-3p   | 4.14418426   | 4.97684056    | 1.11E-09      | 3.60E-09   |
| hsa-miR-212-5p    | 4.09430777   | 4.39743274    | 6.25E-06      | 1.47E-05   |
| hsa-miR-27a-3p    | 3.90252782   | 14.8141236    | 9.11E-122     | 5.77E-120  |
| hsa-miR-20a-5p    | 3.83363263   | 13.8805897    | 1.05E-129     | 1.11E-127  |
| hsa-miR-17-5p     | 3.69200964   | 12.7084573    | 1.39E-108     | 7.34E-107  |
| hsa-miR-24-2-5p   | 3.63966328   | 9.61502667    | 1.53E-60      | 3.24E-59   |
| hsa-miR-188-5p    | 3.61229463   | 4.61832474    | 1.24E-05      | 2.83E-05   |
| hsa-miR-106a-5p   | 3.54831179   | 4.57397724    | 9.21E-06      | 2.11E-05   |
| hsa-miR-296-5p    | 3.54697725   | 4.93792239    | 2.62E-07      | 6.93E-07   |
| hsa-miR-30a-5p    | 3.39086795   | 14.8228056    | 7.09E-92      | 2.81E-90   |
| hsa-miR-582-3p    | 3.3765649    | 8.68016451    | 4.34E-36      | 4.05E-35   |
| hsa-miR-148b-5p   | 3.20606329   | 7.18419042    | 3.49E-24      | 2.31E-23   |
| hsa-miR-365a-3p   | 3.19723157   | 9.05111693    | 3.11E-21      | 1.67E-20   |
| hsa-miR-365b-3p   | 3.1972281    | 9.05111693    | 3.27E-21      | 1.73E-20   |
| hsa-miR-132-5p    | 3.1595274    | 6.41844964    | 5.46E-17      | 2.44E-16   |
| hsa-miR-181c-5p   | 3.10200939   | 7.41856051    | 1.47E-23      | 8.94E-23   |
| hsa-miR-24-3p     | 3.01398971   | 14.4652848    | 3.66E-68      | 1.05E-66   |
| hsa-miR-1291      | 3.00639667   | 7.81924       | 6.82E-23      | 3.93E-22   |
| hsa-miR-193b-3p   | 3.00084614   | 11.4842427    | 2.21E-60      | 4.38E-59   |
| hsa-miR-23a-3p    | 2.94229734   | 14.1457247    | 7.45E-55      | 1.39E-53   |
| hsa-miR-182-5p    | 2.91662365   | 11.4232812    | 2.83E-45      | 3.59E-44   |
| hsa-miR-183-5p    | 2.68064308   | 10.7425148    | 1.38E-39      | 1.51E-38   |
| hsa-miR-330-3p    | 2.63528633   | 8.03170388    | 6.81E-26      | 4.79E-25   |
| hsa-miR-193b-5p   | 2.60416808   | 5.68848754    | 6.39E-10      | 2.09E-09   |
| hsa-miR-10b-5p    | 2.58680605   | 9.01737006    | 2.84E-23      | 1.70E-22   |
| hsa-miR-125b-1-3p | 2.5350982    | 4.570913      | 0.0002798     | 0.0005543  |
| hsa-miR-4449      | 2.52542894   | 6.00949711    | 3.24E-08      | 9.16E-08   |

|                 |            |            |           |           |
|-----------------|------------|------------|-----------|-----------|
| hsa-miR-365a-5p | 2.52398124 | 5.40041135 | 4.58E-05  | 0.0001015 |
| hsa-miR-330-5p  | 2.5045915  | 6.1457228  | 4.47E-09  | 1.38E-08  |
| hsa-miR-30a-3p  | 2.48561102 | 10.7108776 | 3.05E-40  | 3.59E-39  |
| hsa-miR-181c-3p | 2.26280938 | 6.97242074 | 2.35E-15  | 9.92E-15  |
| hsa-miR-1250-5p | 2.22836422 | 4.60986242 | 0.0029833 | 0.005254  |
| hsa-miR-4326    | 2.2109864  | 6.01883369 | 1.77E-08  | 5.16E-08  |
| hsa-miR-19b-3p  | 2.11155937 | 10.8396125 | 3.17E-25  | 2.14E-24  |
| hsa-miR-148b-3p | 2.10194569 | 11.647217  | 7.71E-39  | 7.89E-38  |
| hsa-miR-584-5p  | 2.07683857 | 5.32719312 | 8.91E-06  | 2.06E-05  |
| hsa-miR-660-5p  | 2.05972988 | 8.82255519 | 1.93E-22  | 1.07E-21  |
| hsa-miR-193a-5p | 2.03129237 | 6.14663    | 5.85E-08  | 1.63E-07  |
| hsa-miR-18a-5p  | 2.01261317 | 7.08362459 | 9.79E-14  | 3.79E-13  |
| hsa-miR-30d-5p  | 1.97126681 | 13.6533165 | 2.46E-29  | 1.90E-28  |
| hsa-miR-99a-5p  | 1.9525308  | 10.5606258 | 2.50E-14  | 1.03E-13  |
| hsa-miR-125b-5p | 1.88279048 | 9.88239626 | 1.17E-25  | 8.10E-25  |
| hsa-miR-3648    | 1.84973382 | 6.1350714  | 1.23E-06  | 3.00E-06  |
| hsa-miR-196a-5p | 1.84138833 | 12.0261738 | 3.55E-28  | 2.68E-27  |
| hsa-miR-92a-3p  | 1.83782047 | 14.630167  | 1.37E-23  | 8.49E-23  |
| hsa-miR-1277-5p | 1.82266277 | 4.39541305 | 0.018666  | 0.0288641 |
| hsa-miR-93-5p   | 1.77848148 | 13.4159255 | 3.42E-23  | 2.01E-22  |
| hsa-miR-4454    | 1.71983776 | 5.61594604 | 5.68E-05  | 0.0001233 |
| hsa-miR-191-5p  | 1.69333319 | 13.6520206 | 8.45E-19  | 4.18E-18  |
| hsa-miR-152-3p  | 1.64461969 | 9.78655896 | 4.23E-14  | 1.70E-13  |
| hsa-miR-30c-5p  | 1.63333861 | 11.6099778 | 1.60E-22  | 9.08E-22  |
| hsa-miR-181d-5p | 1.62857975 | 10.5086852 | 9.53E-21  | 4.95E-20  |
| hsa-miR-4488    | 1.60308112 | 5.14542564 | 0.0016887 | 0.0030415 |
| hsa-miR-629-5p  | 1.50921004 | 8.0117675  | 2.38E-11  | 8.56E-11  |
| hsa-let-7b-3p   | 1.45757862 | 5.71634448 | 0.0001977 | 0.0004043 |
| hsa-miR-100-5p  | 1.45546884 | 12.9377202 | 1.44E-18  | 7.00E-18  |
| hsa-miR-760     | 1.44434454 | 4.64245397 | 0.0187861 | 0.0289086 |
| hsa-miR-542-3p  | 1.40804029 | 6.04479074 | 0.0001786 | 0.0003677 |
| hsa-miR-532-5p  | 1.38052352 | 11.020051  | 2.53E-18  | 1.22E-17  |
| hsa-miR-452-3p  | 1.33422073 | 8.28006663 | 4.13E-09  | 1.28E-08  |
| hsa-miR-30d-3p  | 1.32415439 | 5.32104351 | 0.0148557 | 0.0233131 |
| hsa-miR-7704    | 1.30008496 | 7.9429167  | 2.44E-05  | 5.53E-05  |
| hsa-miR-222-3p  | 1.280666   | 10.968395  | 6.12E-14  | 2.42E-13  |
| hsa-miR-30b-5p  | 1.27175079 | 10.455988  | 4.11E-14  | 1.67E-13  |
| hsa-miR-130a-3p | 1.20254321 | 7.91545914 | 4.81E-07  | 1.24E-06  |
| hsa-miR-425-3p  | 1.20162259 | 7.72246016 | 1.42E-06  | 3.43E-06  |
| hsa-miR-331-5p  | 1.19907837 | 5.87328445 | 0.0007742 | 0.0014784 |
| hsa-miR-17-3p   | 1.19053865 | 4.64387239 | 0.1131389 | 0.1552599 |
| hsa-miR-140-3p  | 1.18835349 | 10.9340732 | 4.84E-09  | 1.48E-08  |
| hsa-miR-18a-3p  | 1.1866023  | 5.43666814 | 0.0152948 | 0.0238839 |
| hsa-miR-501-3p  | 1.18118337 | 6.07630941 | 0.0010059 | 0.0018647 |
| hsa-miR-424-5p  | 1.17008909 | 7.82034275 | 7.91E-07  | 1.98E-06  |
| hsa-miR-425-5p  | 1.15280475 | 10.0248608 | 3.59E-10  | 1.20E-09  |
| hsa-let-7f-2-3p | 1.11252899 | 4.60978948 | 0.1273347 | 0.1710385 |
| hsa-miR-192-5p  | 1.10453713 | 11.0423791 | 4.94E-12  | 1.80E-11  |
| hsa-miR-671-5p  | 1.10018555 | 5.39461116 | 0.0156674 | 0.0243459 |
| hsa-miR-22-3p   | 1.0696644  | 10.9544872 | 9.09E-08  | 2.48E-07  |
| hsa-miR-941     | 1.06494516 | 9.3079386  | 4.85E-07  | 1.24E-06  |
| hsa-miR-29c-3p  | 1.06199647 | 5.62624653 | 0.0525134 | 0.0749854 |

|                 |            |            |           |           |
|-----------------|------------|------------|-----------|-----------|
| hsa-miR-151a-3p | 1.04261862 | 12.7989562 | 1.42E-07  | 3.84E-07  |
| hsa-miR-502-3p  | 1.03440373 | 6.40562963 | 0.0076751 | 0.0127382 |
| hsa-miR-450a-5p | -1.0010251 | 7.46414103 | 8.31E-05  | 0.0001749 |
| hsa-miR-98-5p   | -1.0078164 | 10.683338  | 6.06E-09  | 1.83E-08  |
| hsa-miR-331-3p  | -1.0166738 | 4.81076435 | 0.1185951 | 0.1613505 |
| hsa-miR-877-5p  | -1.0282469 | 5.25079889 | 0.0388291 | 0.0564625 |
| hsa-miR-589-5p  | -1.1167304 | 7.72349138 | 0.0002106 | 0.0004263 |
| hsa-miR-25-5p   | -1.2174413 | 4.46563625 | 0.1354731 | 0.1810477 |
| hsa-miR-378a-5p | -1.2983607 | 5.41659769 | 0.0099357 | 0.0159879 |
| hsa-miR-663a    | -1.3168773 | 7.11750099 | 0.002522  | 0.0044663 |
| hsa-miR-374b-3p | -1.334924  | 4.84749101 | 0.0399373 | 0.0575461 |
| hsa-miR-149-5p  | -1.3400841 | 8.94532753 | 6.23E-11  | 2.19E-10  |
| hsa-miR-424-3p  | -1.3506928 | 6.611821   | 8.72E-05  | 0.0001819 |
| hsa-miR-335-3p  | -1.3536538 | 6.1742719  | 0.0002423 | 0.0004861 |
| hsa-miR-942-5p  | -1.3629867 | 5.00311596 | 0.0092212 | 0.0150677 |
| hsa-miR-744-5p  | -1.3693663 | 8.8567423  | 2.53E-09  | 8.09E-09  |
| hsa-miR-92b-5p  | -1.4117622 | 5.96917787 | 0.000618  | 0.0011945 |
| hsa-miR-499a-5p | -1.4134152 | 5.03560429 | 0.0147185 | 0.0232127 |
| hsa-miR-27b-5p  | -1.4695114 | 5.0564326  | 0.0230241 | 0.0349218 |
| hsa-miR-454-3p  | -1.4844247 | 8.32045915 | 6.64E-11  | 2.31E-10  |
| hsa-miR-874-3p  | -1.5333828 | 5.56008882 | 0.0010993 | 0.0020144 |
| hsa-let-7b-5p   | -1.5456009 | 14.1512716 | 2.32E-26  | 1.67E-25  |
| hsa-miR-455-5p  | -1.6424706 | 9.13354039 | 7.29E-14  | 2.85E-13  |
| hsa-miR-1301-3p | -1.6551142 | 4.87927058 | 0.0058938 | 0.0101541 |
| hsa-miR-185-3p  | -1.6922124 | 4.74000515 | 0.0251035 | 0.0377147 |
| hsa-miR-345-5p  | -1.820634  | 7.65895958 | 2.90E-12  | 1.07E-11  |
| hsa-miR-769-5p  | -1.8487205 | 8.79353164 | 7.28E-18  | 3.40E-17  |
| hsa-miR-486-5p  | -1.8505806 | 7.15571945 | 1.28E-08  | 3.82E-08  |
| hsa-miR-590-3p  | -1.8628791 | 6.85830297 | 1.57E-08  | 4.60E-08  |
| hsa-let-7f-5p   | -1.9368123 | 14.8892719 | 7.05E-36  | 6.39E-35  |
| hsa-miR-423-5p  | -1.9690986 | 10.515723  | 8.11E-18  | 3.73E-17  |
| hsa-miR-625-3p  | -1.9712322 | 5.95654641 | 6.62E-06  | 1.54E-05  |
| hsa-miR-15b-3p  | -1.9824337 | 8.42095627 | 1.22E-16  | 5.37E-16  |
| hsa-miR-32-3p   | -2.0233815 | 5.11829609 | 0.0013281 | 0.0024057 |
| hsa-miR-16-2-3p | -2.0594565 | 9.2687379  | 7.19E-20  | 3.67E-19  |
| hsa-miR-374a-3p | -2.0614167 | 6.35074991 | 4.92E-08  | 1.38E-07  |
| hsa-miR-133a-3p | -2.0772374 | 4.73779695 | 0.0070731 | 0.0119264 |
| hsa-miR-1       | -2.0781333 | 7.0234489  | 2.33E-12  | 8.68E-12  |
| hsa-miR-7641    | -2.1735726 | 11.2958233 | 2.67E-18  | 1.26E-17  |
| hsa-miR-26a-5p  | -2.1814089 | 15.2968747 | 4.51E-39  | 4.77E-38  |
| hsa-miR-548k    | -2.2869856 | 5.45356698 | 5.86E-06  | 1.39E-05  |
| hsa-let-7a-5p   | -2.2977814 | 13.7860112 | 1.24E-49  | 1.97E-48  |
| hsa-miR-218-5p  | -2.3256167 | 7.07630373 | 1.09E-10  | 3.75E-10  |
| hsa-miR-130b-5p | -2.3361136 | 6.90074204 | 1.64E-12  | 6.19E-12  |
| hsa-miR-3609    | -2.3483465 | 5.5078573  | 0.0004114 | 0.0008101 |
| hsa-miR-135b-5p | -2.4480439 | 7.72360205 | 1.70E-16  | 7.40E-16  |
| hsa-miR-1180-3p | -2.4639653 | 8.38849613 | 6.48E-24  | 4.11E-23  |
| hsa-miR-505-3p  | -2.4844886 | 7.01252124 | 5.91E-16  | 2.53E-15  |
| hsa-miR-935     | -2.5090269 | 5.61344913 | 3.41E-07  | 8.86E-07  |
| hsa-let-7e-5p   | -2.5656847 | 9.49831852 | 7.69E-30  | 6.25E-29  |
| hsa-miR-28-3p   | -2.586018  | 10.8975487 | 1.48E-38  | 1.47E-37  |
| hsa-miR-663b    | -2.7274469 | 4.50504049 | 0.0004535 | 0.0008873 |

|                  |            |            |           |           |
|------------------|------------|------------|-----------|-----------|
| hsa-miR-455-3p   | -2.8519706 | 6.63237027 | 2.05E-14  | 8.57E-14  |
| hsa-let-7i-5p    | -2.888893  | 16.3611296 | 5.07E-70  | 1.61E-68  |
| hsa-miR-328-3p   | -2.902498  | 7.36785438 | 7.10E-22  | 3.88E-21  |
| hsa-miR-28-5p    | -2.928071  | 8.64232507 | 9.55E-35  | 8.41E-34  |
| hsa-miR-143-3p   | -2.9829542 | 9.67359029 | 5.68E-46  | 7.51E-45  |
| hsa-let-7d-5p    | -3.1684967 | 10.9039653 | 1.08E-61  | 2.45E-60  |
| hsa-miR-1246     | -3.3894718 | 14.7254882 | 5.10E-28  | 3.76E-27  |
| hsa-miR-34c-5p   | -3.403589  | 4.93835579 | 4.83E-05  | 0.0001063 |
| hsa-miR-184      | -3.4676688 | 4.41930027 | 0.0007333 | 0.0014088 |
| hsa-miR-15b-5p   | -3.562668  | 9.81716952 | 4.35E-40  | 4.92E-39  |
| hsa-miR-451a     | -3.631175  | 7.58304938 | 1.16E-17  | 5.25E-17  |
| hsa-miR-1248     | -3.7897823 | 6.86006916 | 1.39E-10  | 4.74E-10  |
| hsa-miR-122-5p   | -4.5505061 | 7.30769212 | 4.77E-24  | 3.08E-23  |
| hsa-miR-548ah-3p | -4.5910664 | 5.18869385 | 1.57E-08  | 4.60E-08  |
| hsa-miR-548p     | -4.7520979 | 5.31293574 | 3.09E-09  | 9.69E-09  |
| hsa-miR-146a-3p  | -5.9961491 | 4.69750804 | 8.13E-07  | 2.01E-06  |
| hsa-miR-181a-3p  | -6.1983007 | 4.83722402 | 1.47E-07  | 3.96E-07  |
| hsa-miR-551a     | -6.2395963 | 4.86846099 | 2.81E-08  | 8.04E-08  |
| hsa-miR-598-3p   | -6.287747  | 4.90225145 | 5.91E-08  | 1.63E-07  |
| hsa-miR-155-5p   | -9.1046525 | 9.22715749 | 6.63E-95  | 3.00E-93  |
| hsa-miR-146a-5p  | -12.229015 | 13.097146  | 1.11E-239 | 3.52E-237 |

**Supplementary Table S3.** Differentially expressed exosomal miRNAs were detected by exosomal miRNA sequencing in the supernatant of highly liver metastatic potential gastric cancer cell line MKN45-HL compared with its parental cell line MKN45 (FoldChange  $\geq 2$  or  $\leq 0.5$ ; FDRp value  $< 0.05$ ).
