# Supplementary material for: Gastric cancer-derived exosomal miR-519a-3p promotes liver metastasis by inducing intrahepatic M2-like macrophage-mediated angiogenesis
Source: Springer Nature journal article supplement (doi:10.1186/s13046-022-02499-8), 2022-10-10
Supplement: MOESM1 [file 23588030]

# 1 Supplementary Figure S1

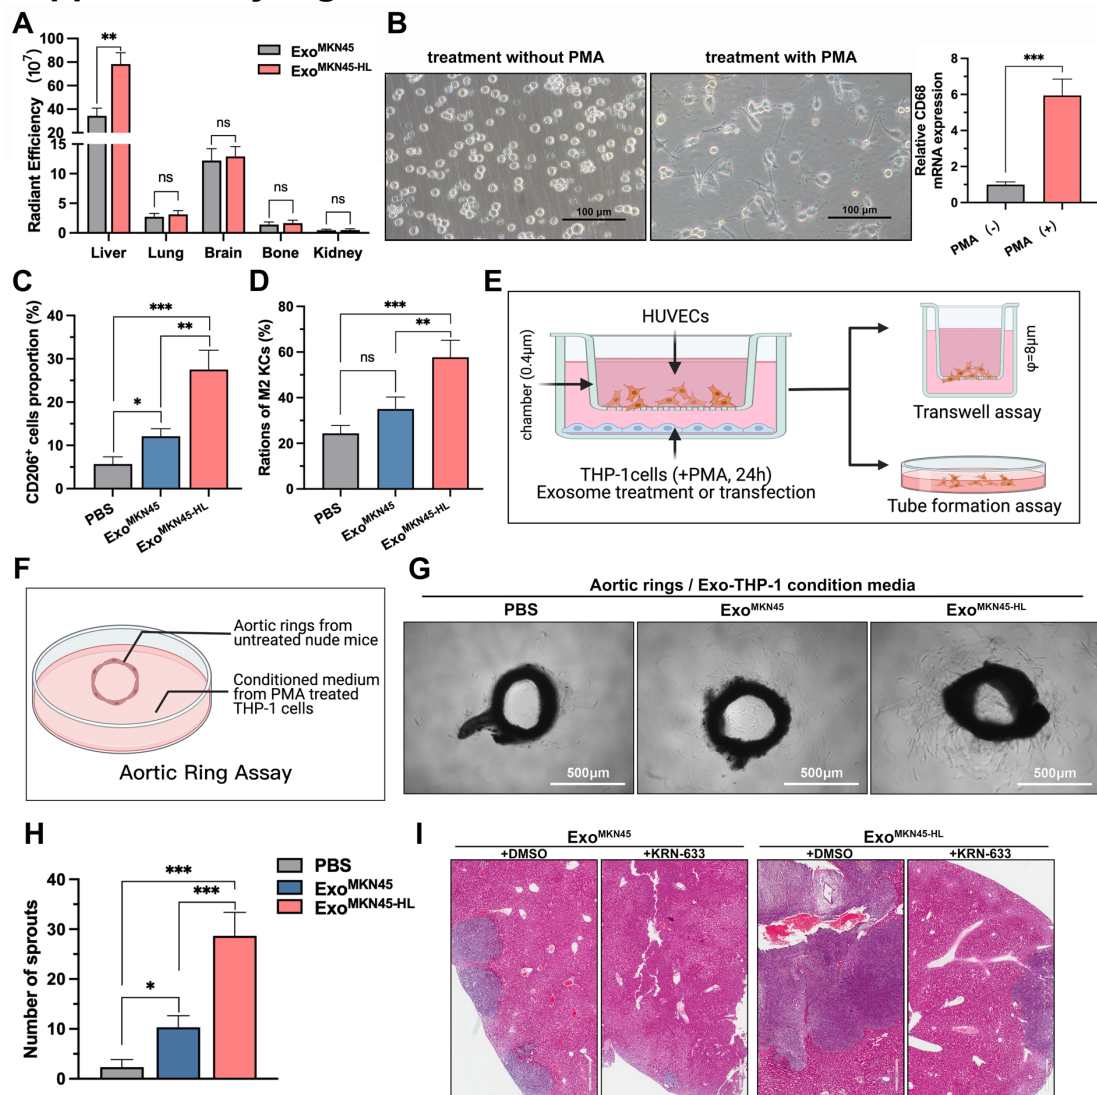

2  
3 **A.** Statistical representation of the intensity of the fluorescence signal in the  
4 liver of mice educated with exosomes from MKN45 and MKN45-HL cells. **B.**  
5 Changes in morphology and CD68 expression (macrophage marker) of THP-  
6 1 cells after stimulation with 12-myristate (PMA) were examined by  
7 microscopy and qRT-PCR, respectively. **C.** The effect of GC cell-derived  
8 exosomes on the expression of CD206 (M2 marker) was detected by flow  
9 cytometry. **D.** Proportion of M2-like macrophages (F4/80<sup>+</sup> and CD206<sup>+</sup>) in the  
10 liver of MKN45- and MKN45-HL- derived exosome-educated mice detected by  
11 immunofluorescence. **E.** Schematic diagram of the co-culture system and  
12 subsequent transwell assay and tube formation assay. The schematic was  
13 drawn using BioRender.com. **F.** Schematic diagram of the aortic ring assay.  
14 The schematic was drawn using BioRender.com. **G, H.** PMA-treated THP-1  
15 cells were precultured with MKN45/MKN45-HL exosomes or PBS, and then

16 aortic rings were cultured with the supernatant of the cells. Vascular  
 17 outgrowth was quantified by counting all sprouts from one ring. Scale bar=500  
 18  $\mu\text{m}$ . **I.** Effect of GC-derived exosome education on liver metastasis in mice;  
 19 representative photographs of H&E staining are shown, Scalebar = 500  $\mu\text{m}$ .  
 20 Data are shown as mean  $\pm$  SD of 3 independent experiments, and statistical  
 21 significance was determined using Student's t test and one-way ANOVA test  
 22 (\*P < 0.05, \*\*P < 0.01, \*\*\*P < 0.001).

23  
 24  
 25  
 26

### Supplementary Figure S2

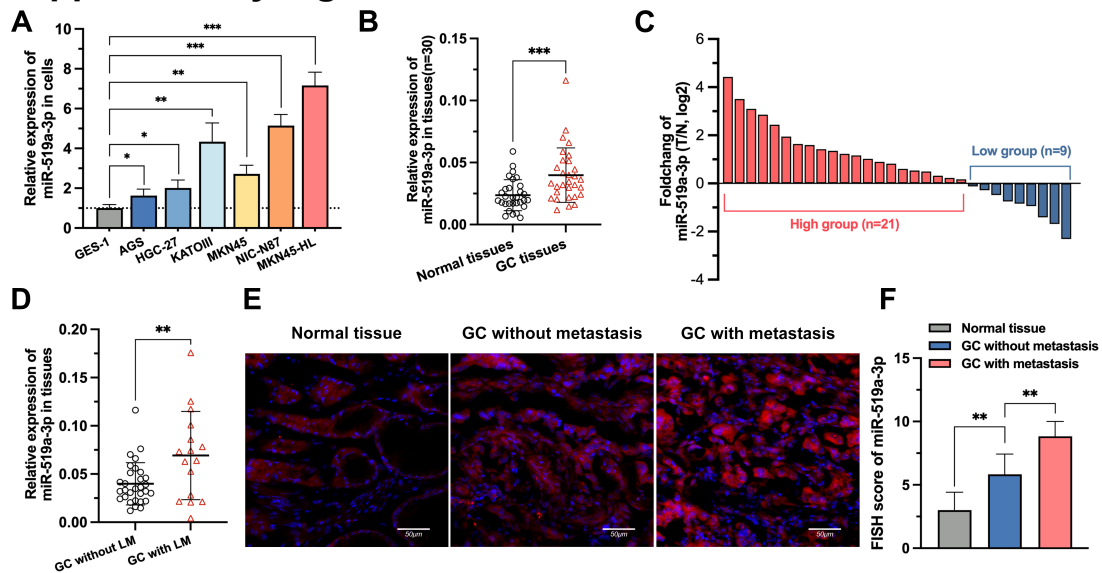

27  
 28 **A.** The qRT-PCR results showed that the expression of miR-519a-3p was  
 29 significantly upregulated in GC cells compared with normal gastric mucosal  
 30 epithelial cells (GES-1). **B.** Relative expression of miR-519a-3p in GC tissues  
 31 and normal tissues. **C.** Fold change of miR-519a-3p in GC tissues compared  
 32 with normal tissues. **D.** Relative expression of miR-519a-3p in GC tissues  
 33 with/without LM. **E, F.** Higher expression of miR-519a-3p was detected by  
 34 FISH in GC tissues with LM compared with GC tissues without LM and normal  
 35 tissues (n=6), Scar bar = 50  $\mu\text{m}$ . Data are shown as mean  $\pm$  SD of 3  
 36 independent experiments, and statistical significance was determined using  
 37 Student's t test and one-way ANOVA test (\*P < 0.05, \*\*P < 0.01, \*\*\*P < 0.001).  
 38

39 **Supplementary Figure S3**

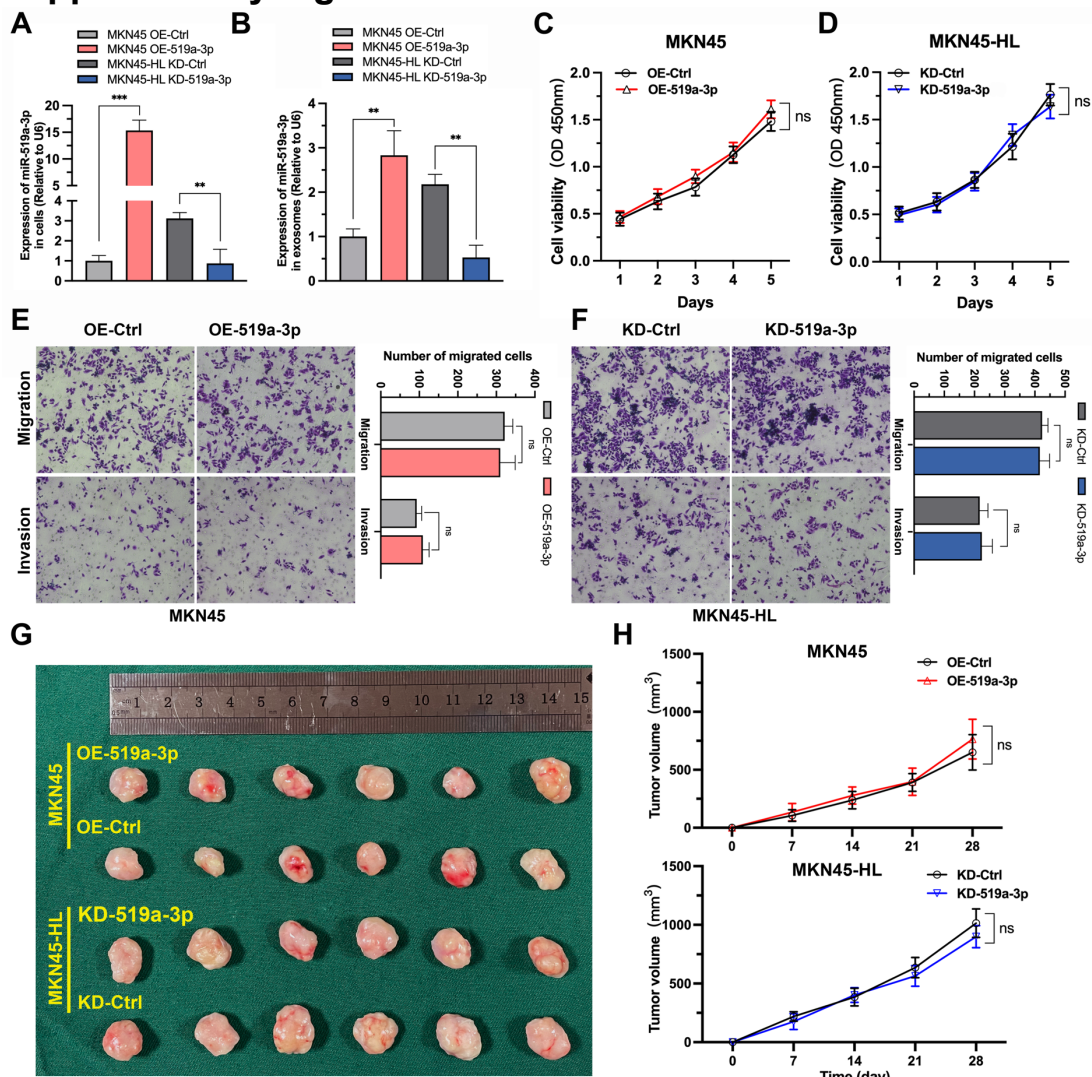

40  
 41 **A,B.** MKN45 and MKN45-HL cells with stable overexpression or knockdown  
 42 of miR-519a-3p were constructed, and their efficiency in cells and exosomes  
 43 was examined by qRT-PCR. **C.** Overexpression of miR-519a-3p showed little  
 44 effect on MKN45 proliferation by CCK-8 assay. **D.** Suppression of miR-519a-  
 45 3p had little effect on the proliferation of MKN45-HL cells by CCK-8 assay. **E.**  
 46 Overexpression of miR-519a-3p in MKN45 cells hardly affects their migration  
 47 and invasion. **F.** Knockdown of miR-519a-3p in MKN45-HL cells show little  
 48 effect on their migration and invasion. **G,H.** Subcutaneous implantation of  
 49 mice with GC cells stably knockdown or overexpressing miR-519a-3p, and  
 50 proliferation of subcutaneous tumors proved to be almost no difference. Data  
 51 are shown as mean  $\pm$  SD of 3 independent experiments, and statistical  
 52 significance was determined using Student's t test and one-way ANOVA test  
 53 (\*P < 0.05, \*\*P < 0.01, \*\*\*P < 0.001).

54 **Supplementary Figure S4**

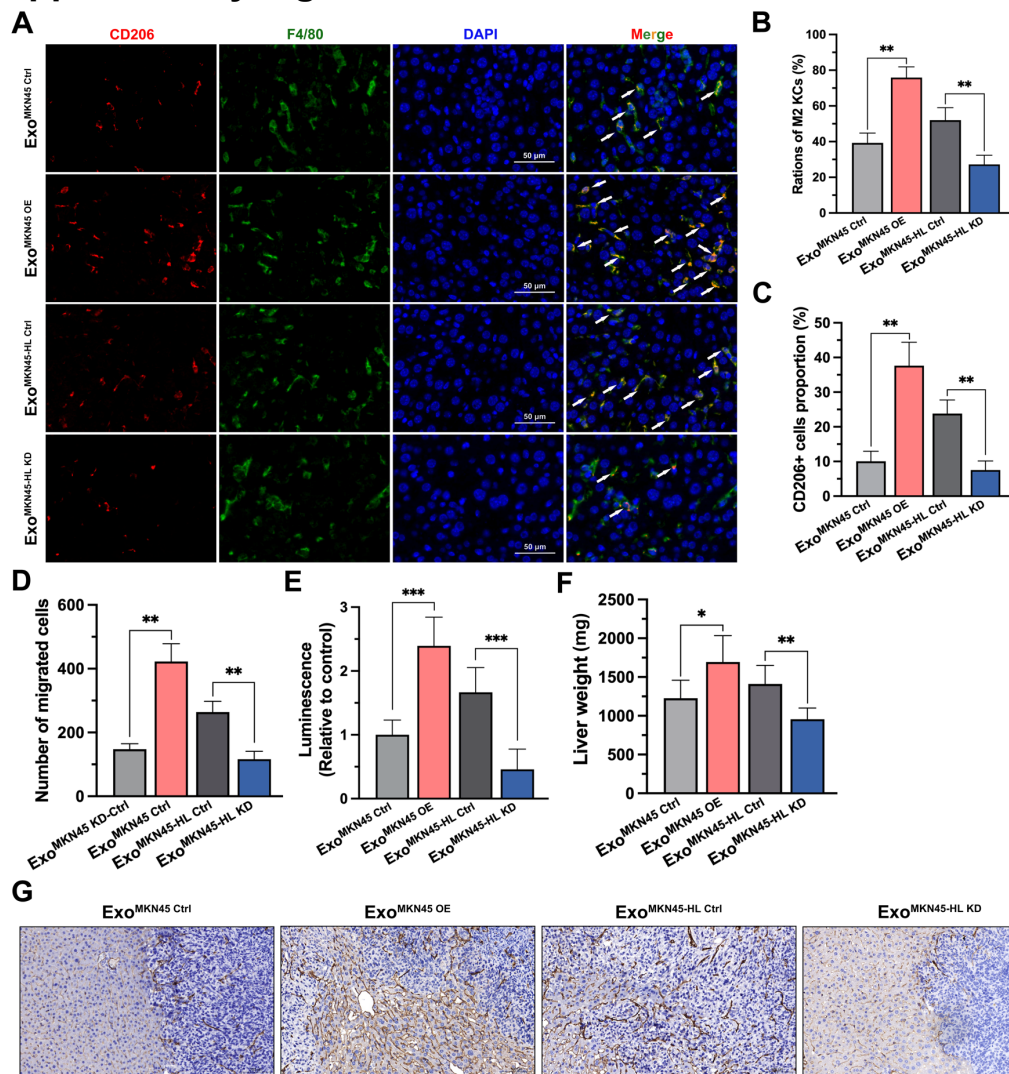

55  
56 **A, B.** Mice were educated with miR-519a-3p-overexpressed/inhibited  
57 exosomes, then the expression of CD206 in liver macrophages (F4/80) were  
58 detected by immunofluorescence. Scale bar=50  $\mu$ m. **B.** The percentage of  
59 CD206 (+) THP-1 cells induced with different exosomes was detected and  
60 analyzed by flow cytometry. **D.** The results of transwell assays were  
61 statistically analyzed to detect the effect of exo-miR-519a-3p on HUVECs. **E,F.**  
62 Statistical analysis of fluorescence signal intensity and weight in mouse liver  
63 to evaluate the effect of exo-miR-519a-3p on LM. **G.** Representative images  
64 of CD31 immunohistochemical staining of LM tissues from mice educated with  
65 miR-519a-3p-inhibited/expressed exosomes, scale bar=100  $\mu$ m. Data are  
66 shown as mean  $\pm$  SD of 3 independent experiments, and statistical  
67 significance was determined using Student's t test (\*P < 0.05, \*\*P < 0.01, \*\*\*P  
68 < 0.001).

69 **Supplementary Table S1**

70

71

**Antibodies used in the present study**

| <b>Product</b>                                 | <b>Source</b>             | <b>No. of Catalogue</b> |
|------------------------------------------------|---------------------------|-------------------------|
| <b>Western blot</b>                            |                           |                         |
| Primary antibody                               |                           |                         |
| Anti-CD81                                      | Abcam                     | Ab79599                 |
| Anti-TSG101                                    | Abcam                     | Ab125011                |
| Anti-Calnexin                                  | Abcam                     | Ab22595                 |
| Anti- $\beta$ -actin                           | Proteintech               | 66009-1-Ig              |
| Anti-DUSP2                                     | Abcam                     | Ab137640                |
| Anti-ERK1/2                                    | Abcam                     | Ab184699                |
| Anti-p-ERK1/2                                  | Cell Signaling Technology | #9101                   |
| Anti-p-c-FOS                                   | Cell Signaling Technology | #5348                   |
| Anti-p-c-JUN                                   | Abcam                     | ab32385                 |
| Secondary antibody                             |                           |                         |
| Anti-rabbit IgG-HRP                            | Proteintech               | SA00001-15              |
| Anti-mouse IgG-HRP                             | Proteintech               | SA00001-1               |
| <b>IHC and IF</b>                              |                           |                         |
| Primary antibody                               |                           |                         |
| Anti-CD31                                      | Cell Signaling Technology | #3528                   |
| Anti-F4/80                                     | Santa Cruz                | Sc-377009               |
| Anti-CD206                                     | Cell Signaling Technology | #24595                  |
| Secondary antibody                             |                           |                         |
| Goat Anti-Mouse IgG H&L<br>(Alexa Fluor® 647)  | Abcam                     | Ab150115                |
| Goat Anti-Rabbit IgG H&L<br>(Alexa Fluor® 594) | Abcam                     | Ab150080                |

72

73

74  
75

**Supplementary Table S2**

**Primer, probes, and siRNAs used in the experiments**

| Gene name              | Sequence (5'-3')                                           |
|------------------------|------------------------------------------------------------|
| qRT-PCR primers:       |                                                            |
| CD68                   | F: GGAAATGCCACGGTTCATCCA<br>R: TGGGGTTCAGTACAGAGATGC       |
| CD163                  | F: TTTGTCAACTTGAGTCCCTTCAC<br>R: TCCCGCTACACTTGTTTTAC      |
| IL-10                  | F: GACTTTAAGGGTTACCTGGGTTG<br>R: TCACATGCGCCTTGATGTCTG     |
| TGFB1                  | F: GGCCAGATCCTGTCCAAGC<br>R: GTGGGTTTCCACCATTAGCAC         |
| VEGFA                  | F: AGGGCAGAATCATCACGAAGT<br>R: AGGGTCTCGATTGGATGGCA        |
| iNOS                   | F: TTCAGTATCACAACCTCAGCAAG<br>R: TGGACCTGCAAGTTAAAATCCC    |
| TNF                    | F: CCTCTCTCTAATCAGCCCTCTG<br>R: GAGGACCTGGGAGTAGATGAG      |
| DUSP2                  | F: GGGCTCCTGTCTACGACCA<br>R: GCAGGTCTGACGAGTGAAGT          |
| $\beta$ -actin         | F: CCCAGGCACCAGGGCGTGAT<br>R: GTCATCTTCTCGCGGTTGGCCTTGGGGT |
| GAPDH                  | F: CGGAGTCAACGGATTTGGTCGTAT<br>R: AGCCTTCTCCATGGTGGTGAAGAC |
| hsa-miR-1283           | F: CGCGCTCTACAAAGGAAAGCG<br>R: CAGTGCGTGTCGTGGAGT          |
| hsa-miR-338-3p         | F: CAGCCACCCACTCAGAGCG<br>R: GTGGCTCTGAGAATCTTCG           |
| hsa-miR-516a-5p        | F: TCGGCAGGUUCUCGAGGAAA<br>R: CACTCAACTGGTGTTCGTGGA        |
| hsa-miR-519a-3p        | F: TGCGGGTGCTCGCTTCGGCAGC<br>R: GTGCAGGGTCCGAGGTATT        |
| hsa-miR-522-3p         | F: CTCTAGAGGGAAGCGCTTTCTG<br>R: GAAAGCGCTTCCCTCTAGAGTT     |
| hsa-miR-675-5p         | F: TGGTGCGGAGAGGGCCACAGTG<br>R: TGGTGTTCGTGGAGTCG          |
| U6                     | F: CTCGCTTCGGCAGCAC<br>R: AACGCTTCACGAATTTGCGT             |
| -----                  |                                                            |
| mimics and inhibitors: |                                                            |
| miR-519a-3p mimics     | AAAGUGCAUCCUUUUAGAGUGU                                     |
| mimic NC               | UUCUCCGAACGUGUCACGUUU                                      |
| miR-519a-3p inhibitors | ACACUCUAAAAGGAUGCACUUU                                     |
| inhibitor NC           | ACACUCUAAAAGGAACGUGAAU                                     |
| -----                  |                                                            |
| probes:                |                                                            |
| miR-519a-3p probes     | ACACUCUAAAAGGAUGCACUUU-/cy3/                               |

76
