# Supplementary material for: Gastric cancer-derived exosomal miR-519a-3p promotes liver metastasis by inducing intrahepatic M2-like macrophage-mediated angiogenesis
Source: Springer Nature journal article supplement (doi:10.1186/s13046-022-02499-8), 2022-10-10
Supplement: MOESM3 [file 23588030]

| <b>Gene ID</b> | <b>Gene Symbol</b> | <b>log2FC</b> | <b>PValue</b> |
|----------------|--------------------|---------------|---------------|
| 100529144      | CORO7-PAM16        | -21.62425861  | 3.18E-08      |
| 106865373      | GET1-SH3BGR        | -5.814862063  | 0.132951906   |
| 632            | BGLAP              | -5.314336629  | 2.75E-04      |
| 110384692      | LOC110384692       | -5.106122962  | 0.192800949   |
| 24150          | TP53TG3            | -4.669133389  | 0.184997694   |
| 414059         | TBC1D3B            | -4.032501512  | 0.036726297   |
| 102723547      | CSAG2              | -4.028104301  | 0.306143437   |
| 111188157      | LYNX1-SLURP2       | -4.027360311  | 0.027630066   |
| 552891         | DNAJC25-GNG10      | -3.858173769  | 0.327449084   |
| 2268           | FGR                | -3.857224435  | 0.037684747   |
| 105375816      | LOC105375816       | -3.856538019  | 0.040529146   |
| 474382         | H2AB1              | -3.660017118  | 0.06219603    |
| 84623          | KIRREL3            | -3.446296944  | 0.111456906   |
| 127550         | A3GALT2            | -3.445209315  | 0.096608325   |
| 157807         | CLVS1              | -3.442936888  | 0.092511972   |
| 8366           | H4C2               | -3.44089043   | 0.089712422   |
| 107080644      | CNPY3-GNMT         | -3.390079324  | 2.91E-04      |
| 731220         | RFX8               | -3.213734828  | 0.060286626   |
| 727909         | GOLGA8Q            | -3.187099563  | 0.203919863   |
| 285588         | EFCAB9             | -3.181284709  | 0.14541234    |
| 140290         | TCP10L             | -3.179864893  | 0.20575912    |
| 84218          | TBC1D3F            | -3.179864893  | 0.20575912    |
| 195977         | ANTXRL             | -3.178859373  | 0.167617133   |
| 6277           | S100A6             | -3.175297015  | 0.001521228   |
| 2041           | EPHA1              | -3.174921567  | 0.16854524    |
| 105371191      | LOC105371191       | -3.174687842  | 0.168601425   |
| 284366         | KLK9               | -3.172134453  | 0.169204901   |
| 102724127      | TP53TG3F           | -3.166526087  | 0.209171585   |
| 1009           | CDH11              | -2.902040909  | 0.132262277   |
| 100505841      | LOC100505841       | -2.90047399   | 0.132661813   |
| 30010          | NXPH1              | -2.897669119  | 0.105747359   |
| 266812         | NAP1L5             | -2.895585428  | 0.123385167   |
| 3892           | KRT86              | -2.894578049  | 0.103094825   |
| 1586           | CYP17A1            | -2.889836813  | 0.123365552   |
| 4607           | MYBPC3             | -2.861292541  | 0.249215304   |
| 151790         | WDR49              | -2.858054967  | 0.222907975   |
| 57626          | KLHL1              | -2.858054967  | 0.222907975   |
| 105377641      | LOC105377641       | -2.857924294  | 0.291282087   |
| 199675         | MCEMP1             | -2.857924294  | 0.291282087   |
| 373856         | USP41              | -2.857924294  | 0.291282087   |
| 286234         | SPATA31E1          | -2.854967582  | 0.251047806   |
| 100288520      | USP17L15           | -2.854671289  | 0.255179607   |
| 23220          | DTX4               | -2.853332543  | 0.224215736   |
| 375686         | SPATC1             | -2.853332543  | 0.224215736   |
| 148170         | CDC42EP5           | -2.851503983  | 0.252055902   |
| 1907           | EDN2               | -2.851503983  | 0.252055902   |
| 389690         | MROH5              | -2.851503983  | 0.252055902   |
| 56676          | ASCL3              | -2.851503983  | 0.252055902   |
| 116            | ADCYAP1            | -2.850032494  | 0.256525304   |
| 101928917      | HSFX3              | -2.711961287  | 0.49173351    |
| 79730          | NSUN7              | -2.708128662  | 0.16403576    |
| 1278           | COL1A2             | -2.706235187  | 0.150070782   |
| 2925           | GRPR               | -2.705251464  | 0.14405598    |
| 440050         | KRTAP5-7           | -2.705251464  | 0.14405598    |
| 645432         | ARRDC5             | -2.70342186   | 0.144282732   |

|           |              |              |             |
|-----------|--------------|--------------|-------------|
| 7053      | TGM3         | -2.701597651 | 0.172694735 |
| 445582    | POTEE        | -2.698100217 | 0.163323958 |
| 4481      | MSR1         | -2.697463779 | 0.145647359 |
| 345557    | PLCXD3       | -2.695696904 | 0.152110384 |
| 66037     | BOLL         | -2.587210528 | 0.034387937 |
| 259294    | TAS2R19      | -2.586342608 | 0.078339798 |
| 646817    | SETSIP       | -2.484221321 | 0.215355241 |
| 105375107 | LOC105375107 | -2.480150126 | 0.195378526 |
| 123264    | SLC51B       | -2.480149743 | 0.195221841 |
| 389336    | C5orf46      | -2.479986669 | 0.201095705 |
| 57419     | SLC24A3      | -2.478042356 | 0.195707677 |
| 441168    | CALHM6       | -2.476106071 | 0.196382994 |
| 143662    | MUC15        | -2.450013511 | 0.413613571 |
| 56140     | PCDHA8       | -2.450013511 | 0.413613571 |
| 5790      | PTPRCAP      | -2.450013511 | 0.413613571 |
| 728911    | CT45A2       | -2.450013511 | 0.413613571 |
| 100507203 | SMLR1        | -2.447383139 | 0.376834872 |
| 259293    | TAS2R30      | -2.447383139 | 0.376834872 |
| 390664    | C1QTNF8      | -2.447383139 | 0.376834872 |
| 926       | CD8B         | -2.447383139 | 0.376834872 |
| 94160     | ABCC12       | -2.447383139 | 0.376834872 |
| 400823    | FAM177B      | -2.445093728 | 0.377594142 |
| 4489      | MT1A         | -2.445093728 | 0.377594142 |
| 5919      | RARRES2      | -2.445093728 | 0.377594142 |
| 388646    | GBP7         | -2.443185395 | 0.378225445 |
| 388649    | C1orf146     | -2.443185395 | 0.378225445 |
| 4493      | MT1E         | -2.443185395 | 0.378225445 |
| 7010      | TEK          | -2.443185395 | 0.378225445 |
| 105372585 | LOC105372585 | -2.442873246 | 0.415956437 |
| 2904      | GRIN2B       | -2.442873246 | 0.415956437 |
| 5232      | PGK2         | -2.442873246 | 0.415956437 |
| 647060    | SPATA31A1    | -2.442873246 | 0.415956437 |
| 727905    | SPATA31A5    | -2.442873246 | 0.415956437 |
| 1414      | CRYBB1       | -2.44088942  | 0.347843086 |
| 196993    | CT62         | -2.44088942  | 0.347843086 |
| 339302    | CPLX4        | -2.44088942  | 0.347843086 |
| 346171    | ZFP57        | -2.44088942  | 0.347843086 |
| 3861      | KRT14        | -2.44088942  | 0.347843086 |
| 5507      | PPP1R3C      | -2.44088942  | 0.347843086 |
| 57467     | HHATL        | -2.44088942  | 0.347843086 |
| 80343     | SEL1L2       | -2.44088942  | 0.347843086 |
| 105375938 | LOC105375938 | -2.438589516 | 0.379751849 |
| 793       | CALB1        | -2.438589516 | 0.379751849 |
| 163589    | TDRD5        | -2.43667254  | 0.380387122 |
| 64446     | DNAI2        | -2.43667254  | 0.380387122 |
| 647286    | RD3L         | -2.43667254  | 0.380387122 |
| 105369535 | LOC105369535 | -2.434366001 | 0.381154276 |
| 386618    | KCTD4        | -2.434366001 | 0.381154276 |
| 388333    | SPDYE4       | -2.434366001 | 0.381154276 |
| 57093     | TRIM49       | -2.434366001 | 0.381154276 |
| 105372714 | LOC105372714 | -2.429704427 | 0.420278875 |
| 122042    | RXFP2        | -2.429704427 | 0.420278875 |
| 171484    | FAM9C        | -2.429704427 | 0.420278875 |
| 187       | APLNR        | -2.429704427 | 0.420278875 |
| 285641    | SLC36A3      | -2.429704427 | 0.420278875 |
| 50508     | NOX3         | -2.429704427 | 0.420278875 |

|           |               |              |             |
|-----------|---------------|--------------|-------------|
| 107986554 | LOC107986554  | -2.325220232 | 0.133706865 |
| 7478      | WNT8A         | -2.24930798  | 0.043784944 |
| 10803     | CCR9          | -2.21927392  | 0.271470092 |
| 680       | BRS3          | -2.21927392  | 0.271470092 |
| 255411    | TEX49         | -2.217004069 | 0.291562814 |
| 277       | AMY1B         | -2.215714702 | 0.268264065 |
| 342933    | ZSCAN5B       | -2.215714702 | 0.268264065 |
| 102724657 | LOC102724657  | -2.213088945 | 0.293033517 |
| 613211    | DEFB134       | -2.212144779 | 0.273323824 |
| 8653      | DDX3Y         | -2.212144401 | 0.273372421 |
| 100288072 | SDR42E2       | -2.212142799 | 0.273578562 |
| 4070      | TACSTD2       | -2.210693248 | 0.293530217 |
| 727684    | C1orf195      | -2.209535603 | 0.300168454 |
| 7224      | TRPC5         | -2.171869123 | 0.191031602 |
| 132200    | C3orf49       | -2.164614921 | 0.172341508 |
| 6447      | SCG5          | -2.160219889 | 0.236062703 |
| 100529215 | ZNF559-ZNF177 | -2.148943899 | 2.36E-04    |
| 150094    | SIK1          | -2.136156655 | 1.56E-11    |
| 653643    | GOLGA6D       | -2.118616139 | 0.124444677 |
| 441581    | FRG2B         | -2.112376569 | 0.154654359 |
| 259283    | MDS2          | -2.003043533 | 0.216653331 |
| 158833    | AWAT1         | -2.001090235 | 0.12688044  |
| 729747    | ZNF878        | -2.00021531  | 0.217446629 |
| 8784      | TNFRSF18      | -1.999381604 | 0.217230932 |
| 105375112 | LOC105375112  | -1.999371913 | 0.213456975 |
| 5696      | PSMB8         | -1.996193162 | 0.255624019 |
| 64499     | TPSB2         | -1.99469381  | 0.271440909 |
| 100132565 | GOLGA8F       | -1.959161702 | 2.80E-04    |
| 105371371 | LOC105371371  | -1.902748584 | 0.426178472 |
| 2213      | FCGR2B        | -1.902748584 | 0.426178472 |
| 101929738 | LOC101929738  | -1.901546898 | 0.115102721 |
| 400757    | C1orf141      | -1.899107799 | 0.392792982 |
| 283600    | SLC25A47      | -1.897536191 | 0.397586919 |
| 126755    | LRRC38        | -1.896097797 | 0.372830755 |
| 127254    | ERICH3        | -1.896096506 | 0.37251633  |
| 5544      | PRB3          | -1.896096506 | 0.37251633  |
| 389161    | ANKUB1        | -1.89601039  | 0.428130993 |
| 100133093 | FAM25G        | -1.89456111  | 0.373035594 |
| 102724652 | CRYAA2        | -1.89456111  | 0.373035594 |
| 79370     | BCL2L14       | -1.89456111  | 0.373035594 |
| 155051    | CRYGN         | -1.893244447 | 0.39484515  |
| 10223     | GPA33         | -1.891739801 | 0.374049629 |
| 121793    | TEX29         | -1.891739801 | 0.374049629 |
| 1411      | CRYBA1        | -1.891739801 | 0.374049629 |
| 6588      | SLN           | -1.891739801 | 0.374049629 |
| 1441      | CSF3R         | -1.891738561 | 0.37430561  |
| 5949      | RBP3          | -1.891738561 | 0.37430561  |
| 402117    | VWC2L         | -1.890038661 | 0.395934186 |
| 57687     | VAT1L         | -1.888661508 | 0.400516621 |
| 101059915 | LOC101059915  | -1.888660899 | 0.400582619 |
| 153643    | FAM81B        | -1.888658315 | 0.400862591 |
| 51237     | MZB1          | -1.887042707 | 0.401130398 |
| 64078     | SLC28A3       | -1.887039341 | 0.401410899 |
| 415       | ARSL          | -1.883595168 | 0.43227669  |
| 165721    | DNAJB8        | -1.883590805 | 0.43257565  |
| 4063      | LY9           | -1.868320434 | 0.168165591 |

|           |              |              |             |
|-----------|--------------|--------------|-------------|
| 634       | CEACAM1      | -1.866594258 | 0.178090151 |
| 105376714 | LOC105376714 | -1.864980486 | 0.594896749 |
| 219681    | ARMC3        | -1.864980486 | 0.594896749 |
| 256369    | CCDC197      | -1.864980486 | 0.594896749 |
| 29113     | C6orf15      | -1.864980486 | 0.594896749 |
| 6530      | SLC6A2       | -1.864980486 | 0.594896749 |
| 653192    | TRIM43B      | -1.864980486 | 0.594896749 |
| 6581      | SLC22A3      | -1.864980486 | 0.594896749 |
| 728049    | CT47A8       | -1.864980486 | 0.594896749 |
| 728090    | CT47A2       | -1.864980486 | 0.594896749 |
| 92129     | RIPPLY1      | -1.864980486 | 0.594896749 |
| 93034     | NT5C1B       | -1.864980486 | 0.594896749 |
| 1043      | CD52         | -1.861235915 | 0.565565187 |
| 105378161 | LOC105378161 | -1.861235915 | 0.565565187 |
| 116173    | CMTM5        | -1.861235915 | 0.565565187 |
| 164237    | WFDC13       | -1.861235915 | 0.565565187 |
| 1770      | DNAH9        | -1.861235915 | 0.565565187 |
| 1828      | DSG1         | -1.861235915 | 0.565565187 |
| 283677    | REC114       | -1.861235915 | 0.565565187 |
| 3158      | HMGCS2       | -1.861235915 | 0.565565187 |
| 344807    | CD200R1L     | -1.861235915 | 0.565565187 |
| 399939    | TRIM49D1     | -1.861235915 | 0.565565187 |
| 5265      | SERPINA1     | -1.861235915 | 0.565565187 |
| 5729      | PTGDR        | -1.861235915 | 0.565565187 |
| 5956      | OPN1LW       | -1.861235915 | 0.565565187 |
| 642623    | UBTFL1       | -1.861235915 | 0.565565187 |
| 8852      | AKAP4        | -1.861235915 | 0.565565187 |
| 91703     | ACY3         | -1.861235915 | 0.565565187 |
| 9256      | TSPOAP1      | -1.861235915 | 0.565565187 |
| 105375809 | LOC105375809 | -1.857897499 | 0.597135456 |
| 105379198 | LOC105379198 | -1.857897499 | 0.597135456 |
| 146862    | UNC45B       | -1.857897499 | 0.597135456 |
| 165904    | XIRP1        | -1.857897499 | 0.597135456 |
| 286887    | KRT6C        | -1.857897499 | 0.597135456 |
| 353132    | LCE1B        | -1.857897499 | 0.597135456 |
| 3561      | IL2RG        | -1.857897499 | 0.597135456 |
| 400830    | DEFB132      | -1.857897499 | 0.597135456 |
| 53831     | GPR84        | -1.857897499 | 0.597135456 |
| 91074     | ANKRD30A     | -1.857897499 | 0.597135456 |
| 101060588 | LOC101060588 | -1.854979327 | 0.567637968 |
| 112267910 | LOC112267910 | -1.854979327 | 0.567637968 |
| 1485      | CTAG1B       | -1.854979327 | 0.567637968 |
| 152940    | C4orf45      | -1.854979327 | 0.567637968 |
| 26526     | TSPAN16      | -1.854979327 | 0.567637968 |
| 3249      | HPN          | -1.854979327 | 0.567637968 |
| 3293      | HSD17B3      | -1.854979327 | 0.567637968 |
| 4622      | MYH4         | -1.854979327 | 0.567637968 |
| 50617     | ATP6V0A4     | -1.854979327 | 0.567637968 |
| 56143     | PCDHA5       | -1.854979327 | 0.567637968 |
| 613210    | DEFB136      | -1.854979327 | 0.567637968 |
| 6332      | SCN7A        | -1.854979327 | 0.567637968 |
| 64092     | SAMSN1       | -1.854979327 | 0.567637968 |
| 84873     | ADGRG7       | -1.854979327 | 0.567637968 |
| 85479     | DNAJC5B      | -1.854979327 | 0.567637968 |
| 100653515 | CEP295NL     | -1.85155339  | 0.568773807 |
| 129446    | XIRP2        | -1.85155339  | 0.568773807 |

|        |               |              |             |
|--------|---------------|--------------|-------------|
| 145942 | TMCO5A        | -1.85155339  | 0.568773807 |
| 259286 | TAS2R40       | -1.85155339  | 0.568773807 |
| 259291 | TAS2R45       | -1.85155339  | 0.568773807 |
| 26693  | OR2V1         | -1.85155339  | 0.568773807 |
| 342574 | KRT27         | -1.85155339  | 0.568773807 |
| 386746 | MRGPRG        | -1.85155339  | 0.568773807 |
| 387837 | CLEC12B       | -1.85155339  | 0.568773807 |
| 392391 | OR5C1         | -1.85155339  | 0.568773807 |
| 494188 | FBXO47        | -1.85155339  | 0.568773807 |
| 6017   | RLBP1         | -1.85155339  | 0.568773807 |
| 6039   | RNASE6        | -1.85155339  | 0.568773807 |
| 645745 | MT1HL1        | -1.85155339  | 0.568773807 |
| 138307 | LCN8          | -1.844832028 | 0.601253336 |
| 140893 | RBBP8NL       | -1.844832028 | 0.601253336 |
| 260429 | PRSS33        | -1.844832028 | 0.601253336 |
| 340900 | EBLN1         | -1.844832028 | 0.601253336 |
| 3575   | IL7R          | -1.844832028 | 0.601253336 |
| 3598   | IL13RA2       | -1.844832028 | 0.601253336 |
| 442186 | OR2J3         | -1.844832028 | 0.601253336 |
| 51365  | PLA1A         | -1.844832028 | 0.601253336 |
| 653220 | XAGE1A        | -1.844832028 | 0.601253336 |
| 728269 | MAGEA9B       | -1.844832028 | 0.601253336 |
| 765    | CA6           | -1.844832028 | 0.601253336 |
| 83661  | MS4A8         | -1.844832028 | 0.601253336 |
| 137735 | ABRA          | -1.808325357 | 0.316685244 |
| 283897 | C16orf54      | -1.80659686  | 0.065058083 |
| 1015   | CDH17         | -1.804387616 | 0.274184681 |
| 51179  | HAO2          | -1.804387616 | 0.274184681 |
| 79674  | VEPH1         | -1.804258485 | 0.300688176 |
| 254528 | MEIOB         | -1.804133374 | 0.279071397 |
| 11211  | FZD10         | -1.801621952 | 0.296258567 |
| 4829   | NMBR          | -1.801621952 | 0.296258567 |
| 286749 | STON1-GTF2A1L | -1.781221116 | 0.030833935 |
| 91227  | GGTLC2        | -1.762842523 | 0.158716662 |
| 29970  | SCHIP1        | -1.737479625 | 0.02247757  |
| 8477   | GPR65         | -1.733558705 | 0.223229563 |
| 90167  | FRMD7         | -1.731964954 | 0.214050317 |
| 343702 | XKR7          | -1.723664091 | 0.009781028 |
| 9547   | CXCL14        | -1.707115383 | 0.20184973  |
| 26683  | OR4F3         | -1.651094372 | 0.070363318 |
| 55001  | TTC22         | -1.612263976 | 0.008525884 |
| 161502 | CFAP161       | -1.592811131 | 0.292004599 |
| 10398  | MYL9          | -1.587446013 | 0.304174053 |
| 89876  | CFAP91        | -1.586519832 | 0.373952922 |
| 55106  | SLFN12        | -1.585835294 | 0.357996218 |
| 1236   | CCR7          | -1.584816562 | 0.198500945 |
| 164312 | LRRN4         | -1.58474857  | 0.354075099 |
| 400831 | C20orf202     | -1.584581616 | 0.15855318  |
| 128488 | WFDC12        | -1.583687796 | 0.263421272 |
| 5251   | PHEX          | -1.583403952 | 0.116393035 |
| 136263 | SSMEM1        | -1.582399914 | 0.374499386 |
| 3821   | KLRC1         | -1.582399914 | 0.374499386 |
| 6370   | CCL25         | -1.582297859 | 0.266121439 |
| 346    | APOC4         | -1.581094868 | 0.382309463 |
| 2938   | GSTA1         | -1.578684418 | 0.375642523 |
| 51703  | ACSL5         | -1.577209592 | 0.401520257 |

|           |              |              |             |
|-----------|--------------|--------------|-------------|
| 338440    | ANO9         | -1.521713082 | 0.083246758 |
| 729857    | RGPD2        | -1.510113605 | 0.169663197 |
| 416       | ARSF         | -1.497846897 | 0.151124842 |
| 151112    | ZSWIM2       | -1.48748424  | 0.562233061 |
| 285659    | OR2V2        | -1.485005737 | 0.537549988 |
| 339403    | RXFP4        | -1.485005737 | 0.537549988 |
| 57113     | TRPC7        | -1.485001923 | 0.53724097  |
| 10017     | BCL2L10      | -1.482921312 | 0.537981056 |
| 611       | OPN1SW       | -1.482921312 | 0.537981056 |
| 2849      | GPR26        | -1.482920729 | 0.537908086 |
| 107984043 | LOC107984043 | -1.481447746 | 0.199028853 |
| 653598    | PPIAL4C      | -1.481184275 | 0.538908196 |
| 728957    | ZNF705D      | -1.481184275 | 0.538908196 |
| 7512      | XPNPEP2      | -1.481184275 | 0.538908196 |
| 11181     | TREH         | -1.481182898 | 0.538598098 |
| 1811      | SLC26A3      | -1.481182898 | 0.538598098 |
| 343413    | FCRL6        | -1.481182898 | 0.538598098 |
| 719       | C3AR1        | -1.481182898 | 0.538598098 |
| 8284      | KDM5D        | -1.481182898 | 0.538598098 |
| 6097      | RORC         | -1.481182574 | 0.538525015 |
| 2259      | FGF14        | -1.480926989 | 0.564884533 |
| 4490      | MT1B         | -1.479096177 | 0.519347917 |
| 768       | CA9          | -1.479096177 | 0.519347917 |
| 80133     | MROH9        | -1.479096177 | 0.519347917 |
| 9365      | KL           | -1.479096177 | 0.519347917 |
| 284348    | LYPD5        | -1.479096153 | 0.519058106 |
| 344191    | EVX2         | -1.479096153 | 0.519058106 |
| 3880      | KRT19        | -1.479096153 | 0.519058106 |
| 56302     | TRPV5        | -1.479096153 | 0.519058106 |
| 22895     | RPH3A        | -1.479096148 | 0.518989811 |
| 4951      | OCM2         | -1.477010134 | 0.540009726 |
| 10578     | GNLY         | -1.477009817 | 0.540083092 |
| 112744    | IL17F        | -1.477008473 | 0.540394387 |
| 259292    | TAS2R46      | -1.477008473 | 0.540394387 |
| 4958      | OMD          | -1.477008473 | 0.540394387 |
| 643965    | TMEM88B      | -1.477008473 | 0.540394387 |
| 81697     | OR2B2        | -1.475265955 | 0.540629096 |
| 145645    | TERB2        | -1.475265376 | 0.540702578 |
| 4625      | MYH7         | -1.475265376 | 0.540702578 |
| 347169    | OR1B1        | -1.475262918 | 0.541014361 |
| 10744     | PTTG2        | -1.473173772 | 0.541373869 |
| 1301      | COL11A1      | -1.473173772 | 0.541373869 |
| 6756      | SSX1         | -1.473172867 | 0.541447492 |
| 3007      | H1-3         | -1.473169031 | 0.541759878 |
| 55363     | HEMGN        | -1.473169031 | 0.541759878 |
| 127064    | OR2T12       | -1.468833484 | 0.568631073 |
| 23017     | FAIM2        | -1.468833484 | 0.568631073 |
| 23624     | CBLC         | -1.468833484 | 0.568631073 |
| 100190949 | C5orf52      | -1.468832095 | 0.568708105 |
| 2266      | FGG          | -1.468832095 | 0.568708105 |
| 392517    | NCBP2L       | -1.468832095 | 0.568708105 |
| 9402      | GRAP2        | -1.468832095 | 0.568708105 |
| 154064    | RAET1L       | -1.468826209 | 0.569034918 |
| 58511     | DNASE2B      | -1.46592813  | 0.296532844 |
| 100996693 | SPEGNB       | -1.457647475 | 0.237341439 |
| 254158    | CXorf58      | -1.453854377 | 0.254090676 |

|           |                 |              |             |
|-----------|-----------------|--------------|-------------|
| 6511      | SLC1A6          | -1.453629433 | 0.270069955 |
| 90594     | ZNF439          | -1.438844755 | 0.130848104 |
| 197       | AHSG            | -1.424468159 | 0.372115791 |
| 8842      | PROM1           | -1.41807012  | 0.334578483 |
| 23504     | RIMBP2          | -1.411739553 | 0.334096674 |
| 100129515 | ETDB            | -1.411693427 | 0.40597116  |
| 1071      | CETP            | -1.40910616  | 0.342464412 |
| 145781    | GCOM1           | -1.361419193 | 0.295533569 |
| 102723502 | LOC102723502    | -1.350635144 | 0.077882392 |
| 342096    | GOLGA6A         | -1.338061366 | 0.054993675 |
| 497190    | CLEC18B         | -1.331216438 | 0.370353361 |
| 2642      | GCGR            | -1.327358409 | 0.479326541 |
| 347516    | DGAT2L6         | -1.326466505 | 0.480176094 |
| 5343      | PLGLB1          | -1.326124741 | 0.32484643  |
| 10242     | KCNMB2          | -1.325133391 | 0.315335538 |
| 6569      | SLC34A1         | -1.324050903 | 0.464727048 |
| 388381    | C17orf98        | -1.323657357 | 0.460904554 |
| 128209    | KLF17           | -1.322676973 | 0.480573601 |
| 401613    | SERTM2          | -1.322528696 | 0.465448179 |
| 728226    | GGTLC3          | -1.322343355 | 0.310991162 |
| 401258    | RAB44           | -1.322160457 | 0.295059247 |
| 253012    | HEPACAM2        | -1.321515723 | 0.461766787 |
| 7036      | TFR2            | -1.321515723 | 0.461766787 |
| 107986244 | LOC107986244    | -1.32018666  | 0.140820981 |
| 654429    | LRTM2           | -1.320161475 | 0.334600494 |
| 2565      | GABRG1          | -1.320113141 | 0.477434637 |
| 6276      | S100A5          | -1.319543922 | 0.481701132 |
| 6869      | TACR1           | -1.319343456 | 0.462062908 |
| 112267947 | LOC112267947    | -1.319033536 | 0.20137463  |
| 399968    | PATE4           | -1.318725911 | 0.148093251 |
| 3689      | ITGB2           | -1.318442639 | 0.315795828 |
| 79698     | ZMAT4           | -1.318136787 | 0.466628601 |
| 2113      | ETS1            | -1.317650085 | 0.216645376 |
| 390667    | PTX4            | -1.317071386 | 0.310996618 |
| 55784     | MCTP2           | -1.316952625 | 0.312844986 |
| 344387    | CDKL4           | -1.316032514 | 0.463398164 |
| 866       | SERPINA6        | -1.313255837 | 0.502124148 |
| 112714    | TUBA3E          | -1.311936168 | 0.253193477 |
| 1646      | AKR1C2          | -1.309691703 | 0.509623197 |
| 140825    | NEURL2          | -1.308577896 | 0.030781515 |
| 100861540 | CYP3A7-CYP3A51P | -1.304091641 | 0.739108543 |
| 57047     | PLSCR2          | -1.288735466 | 0.13880782  |
| 8641      | PCDHGB4         | -1.273298352 | 0.039146898 |
| 343263    | MYBPHL          | -1.263808537 | 0.273157164 |
| 84871     | AGBL4           | -1.26332697  | 0.285789069 |
| 146433    | IL34            | -1.263109822 | 0.283850283 |
| 22829     | NLGN4Y          | -1.262162942 | 0.291187173 |
| 2863      | GPR39           | -1.251449826 | 0.262898849 |
| 84992     | PIGY            | -1.228124034 | 0.43685821  |
| 105376791 | LOC105376791    | -1.226276696 | 0.448440538 |
| 135886    | TMEM270         | -1.223202075 | 0.42340668  |
| 160762    | CCDC63          | -1.222480154 | 0.412500219 |
| 56135     | PCDHAC1         | -1.221402801 | 0.419100384 |
| 168400    | DDX53           | -1.22126641  | 0.248498858 |
| 676       | BRDT            | -1.221094592 | 0.110477379 |
| 2267      | FGL1            | -1.219689086 | 0.451020785 |

|           |              |              |             |
|-----------|--------------|--------------|-------------|
| 9407      | TMPRSS11D    | -1.218710205 | 0.420139238 |
| 151254    | C2CD6        | -1.217516049 | 0.456324687 |
| 57497     | LRFN2        | -1.191759421 | 0.24215116  |
| 93589     | CACNA2D4     | -1.191144368 | 0.234053903 |
| 101930420 | LOC101930420 | -1.189078905 | 0.230313864 |
| 3627      | CXCL10       | -1.17342855  | 0.393946257 |
| 338755    | OR2AG2       | -1.170978755 | 0.228446856 |
| 56106     | PCDHGA10     | -1.170709927 | 0.210301742 |
| 26085     | KLK13        | -1.170048409 | 0.377273289 |
| 3769      | KCNJ13       | -1.168198309 | 0.373310571 |
| 79849     | PDZD3        | -1.168198309 | 0.373310571 |
| 9615      | GDA          | -1.166440909 | 0.215302629 |
| 56        | ACRV1        | -1.156479179 | 0.135926722 |
| 92346     | C1orf105     | -1.133810726 | 0.34113983  |
| 9705      | ST18         | -1.133810726 | 0.34113983  |
| 100533178 | PRORY        | -1.130783266 | 0.372706433 |
| 51411     | BIN2         | -1.129189909 | 0.360558722 |
| 8909      | ENDOU        | -1.127446451 | 0.206699191 |
| 285231    | FBXW12       | -1.124106116 | 0.163260181 |
| 10864     | SLC22A7      | -1.103719251 | 0.150217016 |
| 283298    | OLFML1       | -1.099617577 | 0.276145929 |
| 4050      | LTB          | -1.098459992 | 0.286211965 |
| 107984449 | LOC107984449 | -1.097273875 | 0.301910379 |
| 8993      | PGLYRP1      | -1.095669157 | 0.274283777 |
| 102723382 | LOC102723382 | -1.091714326 | 0.195362774 |
| 441864    | TARM1        | -1.087741116 | 0.248658336 |
| 84063     | KIRREL2      | -1.085913868 | 0.252073916 |
| 163688    | CALML6       | -1.085370566 | 0.046726084 |
| 6753      | SSTR3        | -1.074337844 | 0.227146193 |
| 8797      | TNFRSF10A    | -1.068629856 | 0.204741167 |
| 221421    | RSPH9        | -1.064285212 | 0.074001496 |
| 100534592 | URGCP-MRPS24 | -1.063113985 | 0.515574025 |
| 645202    | LOC645202    | -1.061157808 | 0.286791069 |
| 3122      | HLA-DRA      | -1.046290799 | 0.146039005 |
| 54596     | L1TD1        | -1.025724197 | 0.077377844 |
| 202658    | TRIM39-RPP21 | -1.014574474 | 0.65649067  |
| 6523      | SLC5A1       | -1.005064404 | 0.492520259 |
| 57282     | SLC4A10      | -1.004658681 | 0.429698884 |
| 3827      | KNG1         | -1.00436325  | 0.490194005 |
| 125704    | DIPK1C       | -1.00390227  | 0.554106724 |
| 101060017 | LOC101060017 | -1.003832601 | 0.38805439  |
| 23040     | MYT1L        | -1.003564693 | 0.526345476 |
| 653361    | NCF1         | -1.003132517 | 0.480011959 |
| 5126      | PCSK2        | -1.002648069 | 0.614211374 |
| 5294      | PIK3CG       | -1.002648069 | 0.614211374 |
| 563       | AZGP1        | -1.002648069 | 0.614211374 |
| 85445     | CNTNAP4      | -1.001967626 | 0.651139394 |
| 440955    | TMEM89       | -1.001824859 | 0.533166215 |
| 100652833 | LOC100652833 | -1.001665435 | 0.49520091  |
| 2147      | F2           | -1.001618365 | 0.463545502 |
| 8351      | H3C4         | -1.001505757 | 0.299931528 |
| 5444      | PON1         | -1.001083016 | 0.634964937 |
| 11170     | FAM107A      | -1.001078621 | 0.467374427 |
| 123876    | ACSM2A       | -1.000860946 | 0.514859048 |
| 425054    | VCX3B        | -1.00082582  | 0.626772302 |
| 6361      | CCL17        | -1.00057146  | 0.162419858 |



|           |              |              |             |
|-----------|--------------|--------------|-------------|
| 142685    | ASB15        | -1.000356794 | 0.630074304 |
| 3624      | INHBA        | -1.000116224 | 0.251867622 |
| 158401    | SHOC1        | 1.000772148  | 0.634729162 |
| 29943     | PADI1        | 1.000772148  | 0.634729162 |
| 219578    | ZNF804B      | 1.000811781  | 0.49070096  |
| 116512    | MRGPRD       | 1.000830327  | 0.527190348 |
| 10232     | MSLN         | 1.000903731  | 0.407023446 |
| 8335      | H2AC4        | 1.001154719  | 0.52748994  |
| 10077     | TSPAN32      | 1.001212569  | 0.406679934 |
| 26191     | PTPN22       | 1.00125459   | 0.218086513 |
| 3081      | HGD          | 1.001362505  | 0.54528748  |
| 339766    | MROH2A       | 1.001422926  | 0.514740577 |
| 10568     | SLC34A2      | 1.001556667  | 0.614317045 |
| 119395    | CALHM3       | 1.001556667  | 0.614317045 |
| 147744    | TMEM190      | 1.001559871  | 0.527301395 |
| 54825     | CDHR2        | 1.001582873  | 0.389135809 |
| 6372      | CXCL6        | 1.001936876  | 0.117771789 |
| 4232      | MEST         | 1.002075744  | 0.406369257 |
| 383       | ARG1         | 1.002307563  | 0.401741136 |
| 6445      | SGCG         | 1.002755742  | 0.32524415  |
| 159989    | DEUP1        | 1.003048647  | 0.597046497 |
| 4360      | MRC1         | 1.003107573  | 0.519979688 |
| 128025    | WDR64        | 1.00325573   | 0.327549079 |
| 2911      | GRM1         | 1.003292881  | 0.321477955 |
| 1621      | DBH          | 1.003297124  | 0.575673663 |
| 375759    | C9orf50      | 1.003340005  | 0.204550963 |
| 645073    | GAGE12G      | 1.003367064  | 0.610956717 |
| 376132    | LRRC10       | 1.003437648  | 0.29112376  |
| 4110      | MAGEA11      | 1.003640444  | 0.596796758 |
| 105369246 | LOC105369246 | 1.003838546  | 0.378368395 |
| 940       | CD28         | 1.003929444  | 0.325941287 |
| 8404      | SPARCL1      | 1.003978308  | 0.362527035 |
| 29986     | SLC39A2      | 1.004111823  | 0.454136416 |
| 57471     | ERMN         | 1.004162983  | 0.567052197 |
| 83998     | REG4         | 1.004355915  | 0.462335786 |
| 8612      | PLPP2        | 1.004385288  | 0.451533962 |
| 90134     | KCNH7        | 1.005003408  | 0.525700867 |
| 408263    | FNDC9        | 1.005170319  | 0.596395195 |
| 283971    | CLEC18C      | 1.005201504  | 0.628624317 |
| 144501    | KRT80        | 1.00635515   | 0.609473086 |
| 1393      | CRHBP        | 1.006671318  | 0.612937049 |
| 169044    | COL22A1      | 1.006671318  | 0.612937049 |
| 1634      | DCN          | 1.006918549  | 0.609959786 |
| 109729126 | FAM236C      | 1.007954563  | 0.625129148 |
| 338442    | HCAR2        | 1.008986545  | 0.488205874 |
| 259290    | TAS2R31      | 1.010161686  | 0.608624436 |
| 5657      | PRTN3        | 1.04707989   | 0.0291464   |
| 79825     | EFCC1        | 1.060763774  | 0.169636738 |
| 5650      | KLK7         | 1.067857679  | 0.218814444 |
| 956       | ENTPD3       | 1.069210027  | 0.212542909 |
| 3008      | H1-4         | 1.069710115  | 0.200868175 |
| 10148     | EBI3         | 1.070378535  | 0.219474978 |
| 2203      | FBP1         | 1.072345401  | 0.206736564 |
| 105377022 | LOC105377022 | 1.085144569  | 0.275495489 |
| 5913      | RAPSN        | 1.100463743  | 0.276767468 |
| 3834      | KIF25        | 1.100762876  | 0.272035577 |

|           |              |             |             |
|-----------|--------------|-------------|-------------|
| 283316    | CD163L1      | 1.102125566 | 0.281136501 |
| 392490    | FLJ44635     | 1.105735741 | 0.137746815 |
| 107987477 | LOC107987477 | 1.111008822 | 0.452118616 |
| 29974     | A1CF         | 1.117107166 | 0.152519617 |
| 5731      | PTGER1       | 1.12720527  | 0.156774193 |
| 84870     | RSPO3        | 1.138350846 | 0.177937252 |
| 200008    | CDCP2        | 1.138846321 | 0.175474122 |
| 246176    | GAS2L2       | 1.139930832 | 0.172228679 |
| 84684     | INSM2        | 1.144509974 | 0.19658366  |
| 440804    | RIMBP3B      | 1.145575702 | 0.431310317 |
| 1264      | CNN1         | 1.147851072 | 0.109543299 |
| 1394      | CRHR1        | 1.151167109 | 0.20320584  |
| 729873    | TBC1D3       | 1.162614255 | 0.0053499   |
| 102724646 | LOC102724646 | 1.162664037 | 0.154197513 |
| 6441      | SFTPD        | 1.168451605 | 0.377925444 |
| 149628    | PYHIN1       | 1.171224347 | 0.251983591 |
| 23650     | TRIM29       | 1.172213436 | 0.220274756 |
| 101928436 | LOC101928436 | 1.174230886 | 0.370892747 |
| 105372319 | LOC105372319 | 1.175336217 | 0.383590051 |
| 26025     | PCDHGA12     | 1.182023093 | 0.411912481 |
| 80125     | CCDC33       | 1.191566267 | 0.262853285 |
| 112268102 | LOC112268102 | 1.191801997 | 0.263991403 |
| 730112    | FAM166B      | 1.1924977   | 0.241798097 |
| 107984345 | SMIM38       | 1.220954567 | 0.272241306 |
| 3698      | ITIH2        | 1.221540065 | 0.261776624 |
| 399967    | PATE2        | 1.222035038 | 0.423534757 |
| 149297    | FAM78B       | 1.222159468 | 0.109214963 |
| 353149    | TBC1D26      | 1.222279297 | 0.115608775 |
| 282763    | OR51B5       | 1.223121852 | 0.244521464 |
| 140458    | ASB5         | 1.223354907 | 0.438014545 |
| 114784    | CSMD2        | 1.224024724 | 0.242784053 |
| 121006    | FAM186A      | 1.22447661  | 0.417997664 |
| 389073    | C2orf80      | 1.2256495   | 0.444588432 |
| 101929726 | MYMX         | 1.225766852 | 0.432838072 |
| 3013      | H2AC7        | 1.226074495 | 0.448052597 |
| 254956    | MORN5        | 1.226709114 | 0.275483138 |
| 105378950 | LOC105378950 | 1.227476602 | 0.416828576 |
| 135656    | MUCL3        | 1.229345966 | 0.456576075 |
| 414235    | PRR26        | 1.246163644 | 0.221901612 |
| 100529251 | CKLF-CMTM1   | 1.248247695 | 0.197540579 |
| 101929469 | TEX52        | 1.250540143 | 0.185341408 |
| 54738     | FEV          | 1.251987465 | 0.193740753 |
| 129807    | NEU4         | 1.262787305 | 0.273153498 |
| 344758    | GPR149       | 1.271333709 | 0.301669494 |
| 102723360 | LOC102723360 | 1.285158002 | 0.106601244 |
| 3960      | LGALS4       | 1.316837183 | 0.338752351 |
| 388419    | BTBD17       | 1.317499319 | 0.46699417  |
| 7293      | TNFRSF4      | 1.317682121 | 0.482665141 |
| 6340      | SCNN1G       | 1.318568876 | 0.500563709 |
| 27319     | BHLHE22      | 1.318832492 | 0.48220842  |
| 388743    | CAPN8        | 1.319379355 | 0.481713684 |
| 2928      | GSC2         | 1.320144347 | 0.461851957 |
| 5651      | TMPRSS15     | 1.320463708 | 0.314973911 |
| 1996      | ELAVL4       | 1.320580831 | 0.312040308 |
| 8689      | KRT36        | 1.321507966 | 0.327702382 |
| 221823    | PRPS1L1      | 1.32168212  | 0.465316432 |

|           |              |             |             |
|-----------|--------------|-------------|-------------|
| 653489    | RGPD3        | 1.321776541 | 0.006234423 |
| 837       | CASP4        | 1.32195838  | 0.297653129 |
| 54937     | SOHLH2       | 1.322212464 | 0.461018804 |
| 144423    | GLT1D1       | 1.322835375 | 0.321525377 |
| 2793      | GNGT2        | 1.323281073 | 0.461074768 |
| 348158    | ACSM2B       | 1.323281073 | 0.461074768 |
| 54979     | PLAAT2       | 1.323753112 | 0.481045709 |
| 2847      | MCHR1        | 1.324296935 | 0.480550405 |
| 203328    | SUSD3        | 1.32466753  | 0.480170206 |
| 389549    | FEZF1        | 1.324960464 | 0.202256782 |
| 131578    | LRRC15       | 1.325247746 | 0.460548446 |
| 154197    | PNLDC1       | 1.325401775 | 0.326249309 |
| 58985     | IL22RA1      | 1.325567173 | 0.305262986 |
| 101928268 | LOC101928268 | 1.325834455 | 0.460046864 |
| 127731    | VWA5B1       | 1.325834455 | 0.460046864 |
| 4583      | MUC2         | 1.325834455 | 0.460046864 |
| 29122     | PRSS50       | 1.32635096  | 0.463933017 |
| 441519    | CT45A3       | 1.326894961 | 0.50719413  |
| 6286      | S100P        | 1.331516587 | 0.478483526 |
| 4056      | LTC4S        | 1.363940215 | 0.15506233  |
| 29126     | CD274        | 1.371263454 | 0.064710383 |
| 9075      | CLDN2        | 1.377017047 | 0.231120321 |
| 733       | C8G          | 1.379811126 | 0.036845071 |
| 56107     | PCDHGA9      | 1.382712257 | 0.220206545 |
| 7730      | ZNF177       | 1.383090974 | 0.01271613  |
| 2207      | FCER1G       | 1.412869269 | 0.381942168 |
| 3270      | HRC          | 1.413576277 | 0.331980971 |
| 4969      | OGN          | 1.41489341  | 0.332886424 |
| 151651    | EFHB         | 1.415799232 | 0.099540471 |
| 388112    | NANOGP8      | 1.416621943 | 0.215866446 |
| 1588      | CYP19A1      | 1.418374316 | 0.339495731 |
| 401546    | C9orf152     | 1.419483125 | 0.333962595 |
| 10346     | TRIM22       | 1.419873657 | 0.342856097 |
| 55584     | CHRNA9       | 1.419934974 | 0.363887213 |
| 11277     | TREX1        | 1.42808924  | 0.389079672 |
| 197135    | PATL2        | 1.429724361 | 0.042812418 |
| 28232     | SLCO3A1      | 1.458077662 | 0.251679971 |
| 5552      | SRGN         | 1.460750759 | 0.236265747 |
| 54681     | P4HTM        | 1.461099706 | 0.240653205 |
| 83894     | TTC29        | 1.47813106  | 0.540256387 |
| 84700     | MYO18B       | 1.47813106  | 0.540256387 |
| 149647    | FAM71A       | 1.478134127 | 0.539933363 |
| 121275    | OR10AD1      | 1.478135804 | 0.539756894 |
| 222826    | FAM217A      | 1.478135804 | 0.539756894 |
| 4656      | MYOG         | 1.479002931 | 0.53994603  |
| 6512      | SLC1A7       | 1.479005405 | 0.539623266 |
| 2701      | GJA4         | 1.479006759 | 0.539446939 |
| 100129216 | DEFB131B     | 1.481833752 | 0.538939567 |
| 80834     | TAS1R2       | 1.481833752 | 0.538939567 |
| 131177    | FAM3D        | 1.481834336 | 0.538617637 |
| 81551     | STMN4        | 1.481834336 | 0.538617637 |
| 100329135 | TRPC5OS      | 1.481834655 | 0.538441765 |
| 115749    | C12orf56     | 1.482703446 | 0.517835183 |
| 22918     | CD93         | 1.482703446 | 0.517835183 |
| 26083     | TBC1D29P     | 1.482703446 | 0.517835183 |
| 388125    | C2CD4B       | 1.482703446 | 0.517835183 |

|           |               |             |             |
|-----------|---------------|-------------|-------------|
| 4586      | MUC5AC        | 1.482703446 | 0.517835183 |
| 3697      | ITIH1         | 1.482703449 | 0.517999061 |
| 387733    | IFITM5        | 1.482703449 | 0.517999061 |
| 55816     | DOK5          | 1.482703449 | 0.517999061 |
| 100533183 | ZNF664-RFLNA  | 1.482703455 | 0.518299077 |
| 139065    | SLITRK4       | 1.482703455 | 0.518299077 |
| 146       | ADRA1D        | 1.482703455 | 0.518299077 |
| 11131     | CAPN11        | 1.483572357 | 0.537823564 |
| 28954     | REM1          | 1.483573265 | 0.538320567 |
| 1581      | CYP7A1        | 1.485670269 | 0.563512254 |
| 23708     | GSPT2         | 1.486392717 | 0.536821454 |
| 6285      | S100B         | 1.486392717 | 0.536821454 |
| 10911     | UTS2          | 1.486396513 | 0.537317177 |
| 220082    | CBY2          | 1.486396513 | 0.537317177 |
| 100288485 | MTRNR2L7      | 1.487259477 | 0.536513207 |
| 5918      | RARRES1       | 1.487259477 | 0.536513207 |
| 8600      | TNFSF11       | 1.487259477 | 0.536513207 |
| 10107     | TRIM10        | 1.487261135 | 0.536688203 |
| 23562     | CLDN14        | 1.487261135 | 0.536688203 |
| 440533    | PSG8          | 1.487264168 | 0.537008531 |
| 55891     | LENEP         | 1.487264168 | 0.537008531 |
| 171558    | PTCRA         | 1.488402095 | 0.562238749 |
| 8356      | H3C12         | 1.502765329 | 0.167910774 |
| 728361    | OVOL3         | 1.50373664  | 0.141658014 |
| 9496      | TBX4          | 1.524726022 | 0.079362159 |
| 51412     | ACTL6B        | 1.525536863 | 0.020365422 |
| 56138     | PCDHA11       | 1.578601303 | 0.418302255 |
| 91734     | IDI2          | 1.579486488 | 0.303146003 |
| 339512    | CCDC190       | 1.580813352 | 0.40071     |
| 100132202 | LOC100132202  | 1.582076155 | 0.407752685 |
| 438       | ASMT          | 1.582114841 | 0.359004173 |
| 7201      | TRHR          | 1.582408791 | 0.28921538  |
| 10993     | SDS           | 1.582753321 | 0.397826335 |
| 3004      | GZMM          | 1.584100092 | 0.284731394 |
| 114902    | C1QTNF5       | 1.584417175 | 0.262495179 |
| 110806280 | CCDC194       | 1.584498875 | 0.210287098 |
| 92086     | GGTLC1        | 1.585119218 | 0.358374588 |
| 102724631 | POTEB3        | 1.585707404 | 0.233177918 |
| 27296     | TP53TG5       | 1.586452881 | 0.073019339 |
| 5225      | PGC           | 1.586820958 | 0.387620011 |
| 6347      | CCL2          | 1.586974398 | 0.357952124 |
| 200634    | KRTCAP3       | 1.587269237 | 0.204130944 |
| 100529257 | SYNJ2BP-COX16 | 1.588926082 | 0.094997672 |
| 57830     | KRTAP5-8      | 1.588968524 | 0.414017293 |
| 84631     | SLITRK2       | 1.591461868 | 0.376350522 |
| 56099     | PCDHGB7       | 1.655607287 | 0.079744521 |
| 727830    | SPATA31A3     | 1.671313505 | 0.162001319 |
| 353174    | ZACN          | 1.680999928 | 0.123604364 |
| 27129     | HSPB7         | 1.701469199 | 0.166410145 |
| 148198    | ZNF98         | 1.707576023 | 0.206848251 |
| 6019      | RLN2          | 1.719842032 | 0.434030181 |
| 1645      | AKR1C1        | 1.729795257 | 0.242368047 |
| 3135      | HLA-G         | 1.730200228 | 0.237133966 |
| 219770    | GJD4          | 1.739144805 | 0.212216741 |
| 668       | FOXL2         | 1.764814917 | 0.10340027  |
| 26659     | OR7A5         | 1.806457542 | 0.303856668 |

|           |              |             |             |
|-----------|--------------|-------------|-------------|
| 56000     | NXF3         | 1.806608761 | 0.280537816 |
| 92292     | GLYATL1      | 1.80753154  | 0.279806396 |
| 2357      | FPR1         | 1.808765492 | 0.31987143  |
| 5349      | FXYD3        | 1.810790773 | 0.279182041 |
| 646457    | C19orf67     | 1.810903076 | 0.120793388 |
| 5017      | OVOL1        | 1.81164084  | 0.135010343 |
| 24141     | LAMP5        | 1.812286972 | 0.294111442 |
| 219348    | PLAC9        | 1.81233431  | 0.278682856 |
| 338376    | IFNE         | 1.817815246 | 0.292295317 |
| 137970    | UNC5D        | 1.850118753 | 0.599836446 |
| 170825    | GSX2         | 1.850118753 | 0.599836446 |
| 26103     | LRIT1        | 1.850118753 | 0.599836446 |
| 26246     | OR2L2        | 1.850118753 | 0.599836446 |
| 2652      | OPN1MW       | 1.850118753 | 0.599836446 |
| 3250      | HPR          | 1.850118753 | 0.599836446 |
| 57818     | G6PC2        | 1.850118753 | 0.599836446 |
| 9086      | EIF1AY       | 1.850118753 | 0.599836446 |
| 10637     | LEFTY1       | 1.850252769 | 0.084320866 |
| 100131303 | DPEP2NB      | 1.856553173 | 0.567383586 |
| 107987238 | LOC107987238 | 1.856553173 | 0.567383586 |
| 114769    | CARD16       | 1.856553173 | 0.567383586 |
| 116369    | SLC26A8      | 1.856553173 | 0.567383586 |
| 117245    | PLAAT5       | 1.856553173 | 0.567383586 |
| 1472      | CST4         | 1.856553173 | 0.567383586 |
| 2328      | FMO3         | 1.856553173 | 0.567383586 |
| 2557      | GABRA4       | 1.856553173 | 0.567383586 |
| 374860    | ANKRD30B     | 1.856553173 | 0.567383586 |
| 4648      | MYO7B        | 1.856553173 | 0.567383586 |
| 474354    | LRRC18       | 1.856553173 | 0.567383586 |
| 480       | ATP1A4       | 1.856553173 | 0.567383586 |
| 4990      | SIX6         | 1.856553173 | 0.567383586 |
| 5340      | PLG          | 1.856553173 | 0.567383586 |
| 5539      | PPY          | 1.856553173 | 0.567383586 |
| 5948      | RBP2         | 1.856553173 | 0.567383586 |
| 6010      | RHO          | 1.856553173 | 0.567383586 |
| 7140      | TNNT3        | 1.856553173 | 0.567383586 |
| 83795     | KCNK16       | 1.856553173 | 0.567383586 |
| 100533181 | FXYD6-FXYD2  | 1.85797954  | 0.566910528 |
| 10720     | UGT2B11      | 1.85797954  | 0.566910528 |
| 119587    | CPXM2        | 1.85797954  | 0.566910528 |
| 124538    | OR4D2        | 1.85797954  | 0.566910528 |
| 140258    | KRTAP13-1    | 1.85797954  | 0.566910528 |
| 155038    | GIMAP8       | 1.85797954  | 0.566910528 |
| 171169    | SPACA4       | 1.85797954  | 0.566910528 |
| 2191      | FAP          | 1.85797954  | 0.566910528 |
| 219968    | OR5B21       | 1.85797954  | 0.566910528 |
| 246744    | STH          | 1.85797954  | 0.566910528 |
| 26298     | EHF          | 1.85797954  | 0.566910528 |
| 286514    | MAGEB18      | 1.85797954  | 0.566910528 |
| 3048      | HBG2         | 1.85797954  | 0.566910528 |
| 3467      | IFNW1        | 1.85797954  | 0.566910528 |
| 362       | AQP5         | 1.85797954  | 0.566910528 |
| 50964     | SOST         | 1.85797954  | 0.566910528 |
| 51059     | FAM135B      | 1.85797954  | 0.566910528 |
| 56344     | CABP5        | 1.85797954  | 0.566910528 |
| 5967      | REG1A        | 1.85797954  | 0.566910528 |

|           |              |             |             |
|-----------|--------------|-------------|-------------|
| 7069      | THRSP        | 1.85797954  | 0.566910528 |
| 7984      | ARHGEF5      | 1.85797954  | 0.566910528 |
| 79843     | FAM124B      | 1.85797954  | 0.566910528 |
| 8190      | MIA          | 1.85797954  | 0.566910528 |
| 84072     | HORMAD1      | 1.85797954  | 0.566910528 |
| 8735      | MYH13        | 1.85797954  | 0.566910528 |
| 100287226 | ZNF729       | 1.862716812 | 0.595862083 |
| 10143     | CLEC3A       | 1.862716812 | 0.595862083 |
| 107987289 | LOC107987289 | 1.862716812 | 0.595862083 |
| 116179    | TGM7         | 1.862716812 | 0.595862083 |
| 161931    | ADAD2        | 1.862716812 | 0.595862083 |
| 1758      | DMP1         | 1.862716812 | 0.595862083 |
| 2248      | FGF3         | 1.862716812 | 0.595862083 |
| 282616    | IFNL2        | 1.862716812 | 0.595862083 |
| 390063    | OR51I1       | 1.862716812 | 0.595862083 |
| 390616    | ANKRD34C     | 1.862716812 | 0.595862083 |
| 53836     | GPR87        | 1.862716812 | 0.595862083 |
| 5540      | NPY4R        | 1.862716812 | 0.595862083 |
| 57172     | CAMK1G       | 1.862716812 | 0.595862083 |
| 654231    | OCM          | 1.862716812 | 0.595862083 |
| 107985022 | LOC107985022 | 1.864020859 | 0.56490807  |
| 116441    | TM4SF18      | 1.864020859 | 0.56490807  |
| 1230      | CCR1         | 1.864020859 | 0.56490807  |
| 131377    | KLHL40       | 1.864020859 | 0.56490807  |
| 200726    | FAM237A      | 1.864020859 | 0.56490807  |
| 3443      | IFNA6        | 1.864020859 | 0.56490807  |
| 3577      | CXCR1        | 1.864020859 | 0.56490807  |
| 496       | ATP4B        | 1.864020859 | 0.56490807  |
| 50863     | NTM          | 1.864020859 | 0.56490807  |
| 51802     | ASIC5        | 1.864020859 | 0.56490807  |
| 5739      | PTGIR        | 1.864020859 | 0.56490807  |
| 6373      | CXCL11       | 1.864020859 | 0.56490807  |
| 6759      | SSX4         | 1.864020859 | 0.56490807  |
| 84647     | PLA2G12B     | 1.864020859 | 0.56490807  |
| 121256    | TMEM132D     | 1.865668339 | 0.594928918 |
| 1232      | CCR3         | 1.865668339 | 0.594928918 |
| 127707    | KLHDC7A      | 1.865668339 | 0.594928918 |
| 170371    | TMEM273      | 1.865668339 | 0.594928918 |
| 2352      | FOLR3        | 1.865668339 | 0.594928918 |
| 285093    | RTP5         | 1.865668339 | 0.594928918 |
| 337968    | KRTAP6-3     | 1.865668339 | 0.594928918 |
| 340543    | TCEAL5       | 1.865668339 | 0.594928918 |
| 390442    | OR11H4       | 1.865668339 | 0.594928918 |
| 7044      | LEFTY2       | 1.865668339 | 0.594928918 |
| 7412      | VCAM1        | 1.865668339 | 0.594928918 |
| 83897     | KRTAP3-2     | 1.865668339 | 0.594928918 |
| 1297      | COL9A1       | 1.883868606 | 0.18485258  |
| 11262     | SP140        | 1.888813582 | 0.430613558 |
| 2844      | GPR21        | 1.892754762 | 0.399447927 |
| 727837    | SSX2B        | 1.894960428 | 0.394805188 |
| 100130933 | SMIM6        | 1.894961842 | 0.394514452 |
| 100507537 | STRIT1       | 1.894961842 | 0.394514452 |
| 402381    | SOHLH1       | 1.895713497 | 0.372805468 |
| 7173      | TPO          | 1.896296138 | 0.394351594 |
| 56112     | PCDHGA3      | 1.896297265 | 0.39390271  |
| 1381      | CRABP1       | 1.898435051 | 0.372030308 |

|           |              |             |             |
|-----------|--------------|-------------|-------------|
| 1804      | DPP6         | 1.899074368 | 0.371670256 |
| 4345      | CD200        | 1.899074368 | 0.371670256 |
| 1844      | DUSP2        | 1.899074765 | 0.037181412 |
| 388960    | C2orf78      | 1.899074765 | 0.371814116 |
| 80117     | ARL14        | 1.901960413 | 0.392432194 |
| 7200      | TRH          | 1.903591168 | 0.425850879 |
| 9363      | RAB33A       | 1.930068629 | 0.061284547 |
| 26873     | OPLAH        | 1.997253005 | 0.213751322 |
| 200232    | FAM209A      | 2.004456482 | 0.137344925 |
| 219539    | YPEL4        | 2.0054837   | 0.137234036 |
| 941       | CD80         | 2.007042165 | 0.219079646 |
| 728378    | POTEF        | 2.043351796 | 0.528589951 |
| 10750     | GRAP         | 2.086846706 | 0.073857532 |
| 93649     | MYOCD        | 2.173430053 | 0.163849684 |
| 7143      | TNR          | 2.178155176 | 0.187598518 |
| 389941    | C1QL3        | 2.205164646 | 0.027639268 |
| 345062    | PRSS48       | 2.213300736 | 0.299538199 |
| 1369      | CPN1         | 2.213851772 | 0.299370701 |
| 284654    | RSPO1        | 2.216351191 | 0.272220745 |
| 84290     | CAPNS2       | 2.218587713 | 0.267632479 |
| 22917     | ZP1          | 2.218588186 | 0.267421138 |
| 124925    | SEZ6         | 2.218588445 | 0.267305643 |
| 54714     | CNGB3        | 2.219107643 | 0.267152467 |
| 284099    | C17orf78     | 2.219625278 | 0.291281262 |
| 79747     | ADGB         | 2.220804372 | 0.271022577 |
| 111064647 | CSNKA2IP     | 2.221312816 | 0.266503206 |
| 2949      | GSTM5        | 2.222502979 | 0.296510457 |
| 125958    | OR7D4        | 2.223188122 | 0.296540109 |
| 81931     | ZNF93        | 2.223692381 | 0.289816725 |
| 5314      | PKHD1        | 2.224831013 | 0.296042703 |
| 337972    | KRTAP19-5    | 2.32465687  | 0.13535306  |
| 105371045 | PERCC1       | 2.435011564 | 0.418816771 |
| 343       | AQP8         | 2.435011564 | 0.418816771 |
| 10249     | GLYAT        | 2.439458621 | 0.379750245 |
| 135644    | TRIM40       | 2.439458621 | 0.379750245 |
| 200403    | VWA3B        | 2.439458621 | 0.379750245 |
| 2845      | GPR22        | 2.439458621 | 0.379750245 |
| 79097     | TRIM48       | 2.439458621 | 0.379750245 |
| 102723930 | LOC102723930 | 2.440418655 | 0.379431187 |
| 1791      | DNTT         | 2.440418655 | 0.379431187 |
| 100129407 | FAM236A      | 2.444490184 | 0.346942812 |
| 147746    | HIPK4        | 2.444490184 | 0.346942812 |
| 644100    | ARL14EPL     | 2.444490184 | 0.346942812 |
| 79290     | OR13A1       | 2.444490184 | 0.346942812 |
| 10022     | INSL5        | 2.445444842 | 0.377763582 |
| 10871     | CD300C       | 2.445444842 | 0.377763582 |
| 196335    | OR56B4       | 2.445444842 | 0.377763582 |
| 4114      | MAGEB3       | 2.445444842 | 0.377763582 |
| 6011      | GRK1         | 2.445444842 | 0.377763582 |
| 1834      | DSPP         | 2.44854619  | 0.376736292 |
| 29114     | TAGLN3       | 2.44854619  | 0.376736292 |
| 5535      | PPP3R2       | 2.44854619  | 0.376736292 |
| 326340    | ZAR1         | 2.449500179 | 0.376420021 |
| 3512      | JCHAIN       | 2.449500179 | 0.376420021 |
| 80168     | MOGAT2       | 2.449500179 | 0.376420021 |
| 8290      | H3-4         | 2.449500179 | 0.376420021 |

|           |                 |             |             |
|-----------|-----------------|-------------|-------------|
| 101929601 | LOC101929601    | 2.450684974 | 0.413673855 |
| 282617    | IFNL3           | 2.450684974 | 0.413673855 |
| 80201     | HKDC1           | 2.450684974 | 0.413673855 |
| 51617     | NSG2            | 2.480399155 | 0.195326621 |
| 105378947 | LOC105378947    | 2.482704799 | 0.190911719 |
| 254050    | LRRC43          | 2.483143652 | 0.194558541 |
| 6338      | SCNN1B          | 2.484569925 | 0.194456414 |
| 5009      | OTC             | 2.486603324 | 0.216564606 |
| 377630    | USP17L2         | 2.48704898  | 0.214808082 |
| 5350      | PLN             | 2.585297042 | 0.081796546 |
| 349334    | FOXD4L4         | 2.699641021 | 0.165906219 |
| 29850     | TRPM5           | 2.704274993 | 0.142500067 |
| 100526760 | ABHD14A-ACY1    | 2.707115732 | 0.003130109 |
| 3316      | HSPB2           | 2.853432371 | 0.25578985  |
| 79697     | RIOX1           | 2.853432371 | 0.25578985  |
| 5313      | PKLR            | 2.856527734 | 0.250848795 |
| 146167    | SLC38A8         | 2.857331513 | 0.223348379 |
| 2307      | FOXS1           | 2.857331513 | 0.223348379 |
| 11026     | LILRA3          | 2.860281253 | 0.22253279  |
| 117579    | RLN3            | 2.860281253 | 0.22253279  |
| 146849    | CCDC42          | 2.860281253 | 0.22253279  |
| 2350      | FOLR2           | 2.860281253 | 0.22253279  |
| 4161      | MC5R            | 2.860974806 | 0.222341045 |
| 6846      | XCL2            | 2.863377232 | 0.252925729 |
| 9934      | P2RY14          | 2.901827977 | 0.122369282 |
| 389090    | OR6B2           | 3.072284397 | 0.092467663 |
| 102724101 | TP53TG3E        | 3.177212004 | 0.168205241 |
| 284257    | BOD1L2          | 3.177212004 | 0.168205241 |
| 55998     | NXF5            | 3.180301858 | 0.142086965 |
| 1440      | CSF3            | 3.181411088 | 0.167216346 |
| 401387    | LRRD1           | 3.183217958 | 0.141461001 |
| 100528032 | KLRC4-KLRK1     | 3.184722492 | 0.204737102 |
| 391123    | VSIG8           | 3.184722492 | 0.204737102 |
| 2939      | GSTA2           | 3.18574028  | 0.166201616 |
| 653550    | TP53TG3C        | 3.186317167 | 0.166066532 |
| 127435    | PODN            | 3.21996022  | 0.054720772 |
| 79008     | SLX1B           | 3.243689425 | 0.231831841 |
| 5624      | PROC            | 3.355868262 | 0.042292506 |
| 2899      | GRIK3           | 3.360085507 | 0.045491985 |
| 11036     | GTF2A1L         | 3.434842167 | 0.148824461 |
| 2001      | ELF5            | 3.446934847 | 0.091997207 |
| 57633     | LRRN1           | 3.448605183 | 0.112643716 |
| 692094    | MSMP            | 3.45080869  | 0.145474697 |
| 474381    | H2AB2           | 3.666023128 | 0.06044118  |
| 83740     | H2AB3           | 3.666023128 | 0.06044118  |
| 129868    | TRIM43          | 3.666504156 | 0.078165533 |
| 729355    | TP53TG3B        | 3.673971754 | 0.351631231 |
| 55281     | TMEM140         | 4.433348362 | 0.25917336  |
| 27232     | GNMT            | 4.856443785 | 0.172764073 |
| 407977    | TNFSF12-TNFSF13 | 4.954236927 | 0.206557176 |
| 126961    | H3C14           | 5.386835908 | 0.169196097 |
| 553158    | PRR5-ARHGAP8    | 5.662912409 | 0.133708837 |
| 110354863 | ZNF660-ZNF197   | 6.036750161 | 0.122999941 |
| 107987373 | LOC107987373    | 6.356794096 | 0.104231463 |
| 284040    | CDRT4           | 6.91784557  | 0.076905762 |



**Supplementary Table S4.** Differentially expressed mRNAs were detected by mRNA sequencing in PMA-treated THP-1 cells with knockdown of miR-519a-3p ( $\log_2\text{FoldChange} \geq 1$  or  $\leq -1$ )
